# Supplementary material for: Decline of heterozygosity in a large but isolated population: a 45-year examination of moose genetic diversity on Isle Royale
Source: PeerJ. 2017 Jul 17;5:e3584. doi: 10.7717/peerj.3584 (PMC5516768; doi:10.7717/peerj.3584)
Supplement: Supplemental Information 3 [file peerj-05-3584-s003.xlsx]

## Sheet: Genotypes
moose id	pop	MAF46		MAF70		BM757		Bm848		BM4513		McM58		RT5		RT9		RT30
105	60	110	114	133	137	184	184	354	358	133	133	193	195	150	150	128	130	192	192
212	60	110	110	133	143	184	184	354	358	133	135	195	199	150	150	130	130	192	200
218	60	114	114	133	143	184	184	354	354	133	135	195	195	150	150	126	130	192	192
222	60	110	110	137	143	0	0	354	354	135	135	195	199	150	150	124	126	192	192
239	60	110	114	133	133	184	184	0	0	133	135	0	0	150	150	130	130	0	0
277	60	114	114	133	137	184	184	358	358	135	135	191	199	150	150	126	128	192	192
287	60	110	114	133	137	184	184	358	358	135	135	195	199	150	150	126	130	192	192
301	60	114	114	133	137	188	188	358	358	133	135	195	199	150	150	124	126	192	200
326	60	0	0	0	0	184	184	354	356	0	0	0	0	150	150	130	130	0	0
333	60	110	114	133	137	180	184	354	358	133	135	195	199	150	150	126	130	192	192
334	60	110	114	137	143	180	184	350	356	133	135	195	199	150	150	128	130	192	192
336	60	110	114	133	143	184	184	354	358	133	135	193	195	150	150	130	130	192	200
341	60	110	110	133	143	180	184	354	358	133	135	197	199	150	150	126	130	192	192
349	60	114	114	143	143	184	184	354	358	135	135	195	197	150	150	130	130	192	192
383	60	110	114	133	143	184	188	358	358	133	135	191	195	150	150	126	130	192	192
391	60	114	114	137	137	180	184	354	358	133	135	199	199	150	150	126	130	192	192
410	60	110	114	137	143	180	184	354	358	133	135	199	199	150	150	130	130	192	192
411	60	110	114	137	137	180	184	0	0	135	135	195	199	150	150	130	130	192	200
416	60	112	114	0	0	184	184	354	354	135	135	191	199	150	150	126	130	192	192
418	60	110	114	0	0	184	184	0	0	133	135	0	0	150	150	130	130	0	0
427	60	0	0	137	137	184	184	0	0	133	135	0	0	148	150	128	130	0	0
665	60	0	0	137	143	180	184	354	358	133	135	191	197	0	0	126	126	190	192
702	60	110	114	133	133	0	0	358	358	133	135	195	195	148	150	130	130	0	0
706	60	110	114	133	137	184	184	356	358	133	135	191	197	150	150	130	130	190	192
726	60	108	108	131	133	184	184	0	0	133	135	195	199	0	0	130	130	190	192
740	60	110	114	133	137	184	184	354	358	133	135	0	0	150	150	126	128	192	192
820	60	110	114	137	143	184	188	354	358	135	135	199	199	150	150	130	130	192	192
832	60	110	110	0	0	180	188	350	358	135	135	195	199	150	150	130	130	192	192
853	60	114	114	137	137	180	184	354	354	133	135	197	199	150	150	124	126	192	200
968	60	110	110	137	143	184	184	354	354	135	135	195	199	150	150	124	128	192	192
1226	60	110	114	133	137	184	184	0	0	133	135	193	195	150	150	124	130	192	192
1399	60	110	114	137	143	184	184	354	354	133	135	195	199	150	150	124	130	192	200
1441	60	110	110	133	143	0	0	354	358	133	135	195	199	150	150	130	130	192	200
1459	60	110	110	137	143	180	184	354	358	133	135	197	199	150	150	130	130	192	200
1461	60	110	114	133	143	184	184	350	358	135	135	199	199	150	150	124	130	192	192
1462	60	110	114	133	137	184	184	354	354	133	135	195	197	150	150	130	130	192	200
1463	60	110	114	137	137	184	188	354	358	135	135	195	197	150	150	130	130	192	192
1471	60	0	0	0	0	184	184	358	358	133	135	0	0	150	150	126	130	192	192
1474	60	110	114	133	137	184	184	358	358	133	135	195	199	150	150	0	0	192	192
1481	60	114	114	137	143	184	184	358	358	133	135	195	197	150	150	126	126	192	200
1514	60	114	114	133	143	180	184	0	0	133	135	195	195	150	150	130	130	192	192
1533	60	110	114	137	143	186	188	354	358	121	135	195	199	150	150	124	130	192	192
1536	60	110	110	137	137	180	186	354	354	133	135	195	199	150	150	126	126	192	192
1539	60	114	114	143	143	184	186	350	354	135	135	195	199	150	150	126	130	192	200
1556	60	110	114	137	137	184	184	358	358	133	135	197	199	150	150	126	130	200	200
1567	60	0	0	0	0	184	184	0	0	133	135	0	0	150	150	130	130	0	0
1591	60	0	0	0	0	180	180	0	0	0	0	0	0	0	0	124	124	192	192
1639	60	114	114	0	0	184	186	350	354	135	135	195	199	150	150	126	130	192	200
1644	60	0	0	0	0	182	184	356	356	0	0	0	0	150	152	0	0	0	0
1713	60	114	114	133	137	180	184	354	358	133	135	193	195	150	150	130	130	192	192
1785	60	110	114	0	0	184	184	350	358	133	135	0	0	0	0	126	128	0	0
1270	70	110	114	133	143	180	186	358	358	133	135	195	195	148	150	128	130	0	0
1435	70	110	110	143	143	180	186	354	354	133	135	195	199	150	150	130	130	192	192
1500	70	110	114	137	143	0	0	354	358	135	135	195	199	0	0	124	130	192	192
1540	70	110	114	133	137	180	184	358	358	121	135	195	197	150	150	126	130	192	192
1543	70	114	114	137	143	180	180	354	358	135	135	195	197	0	0	126	130	192	192
1548	70	110	114	137	143	180	186	354	358	135	135	195	199	0	0	130	130	192	200
1574	70	110	114	133	143	186	186	354	358	135	135	195	195	0	0	130	130	192	192
1582	70	110	114	137	143	186	186	354	358	135	135	195	199	150	150	124	130	192	192
1586	70	110	114	133	143	184	184	354	358	121	135	195	195	150	150	130	130	192	200
1602	70	110	114	133	137	184	184	0	0	133	135	0	0	0	0	0	0	0	0
1622	70	110	114	133	137	0	0	0	358	133	135	0	0	0	0	130	130	0	0
1672	70	0	0	133	133	174	184	0	0	133	135	0	0	146	150	0	0	0	0
1681	70	0	0	0	0	0	0	0	0	135	135	0	0	0	0	126	130	0	0
1691	70	0	0	0	0	0	0	350	358	133	135	195	199	150	150	128	128	192	192
1800	70	0	0	133	133	180	186	350	354	133	135	195	199	0	0	126	130	192	192
1803	70	112	114	137	143	180	184	354	354	135	135	195	199	150	150	126	130	192	200
1805	70	110	114	133	137	0	0	0	0	0	0	0	0	150	150	126	130	0	0
1809	70	110	114	143	143	180	186	358	358	135	135	195	195	150	150	126	130	192	192
1822	70	110	114	137	143	180	184	358	358	133	135	195	199	150	150	126	130	192	192
1825	70	112	114	135	137	180	186	354	358	133	135	191	199	150	150	124	130	192	192
1826	70	110	114	0	0	180	188	358	358	135	135	191	195	150	150	126	130	192	192
1827	70	110	114	133	143	180	186	354	354	135	135	195	197	150	150	126	128	192	192
1830	70	114	114	137	143	184	186	350	358	133	133	195	199	150	150	130	130	192	192
1834	70	110	110	137	137	180	186	358	358	133	135	195	199	150	150	126	126	192	192
1840	70	110	114	133	143	180	186	358	358	133	133	193	195	150	150	126	130	192	192
1845	70	110	114	133	133	184	188	354	354	133	135	191	199	150	150	130	130	192	192
1850	70	110	110	133	137	184	188	356	356	133	135	195	199	150	150	130	130	192	192
1902	70	110	114	133	133	184	186	358	358	133	135	193	195	150	150	126	128	192	192
1920	70	114	114	137	143	184	186	354	358	135	135	195	199	150	150	130	130	192	192
1922	70	0	0	0	0	184	184	354	358	135	135	0	0	0	0	126	126	192	192
1928	70	110	114	143	143	180	184	350	356	135	135	191	195	150	150	126	130	192	192
1929	70	110	110	133	133	184	184	350	358	135	135	195	199	150	150	126	130	192	192
1933	70	114	114	133	143	184	184	350	358	135	135	195	199	150	150	130	130	192	200
1934	70	110	110	133	143	180	184	354	354	135	135	193	199	150	150	126	130	192	192
1960	70	114	114	133	143	184	186	354	358	135	135	195	195	150	150	130	130	192	192
1961	70	112	114	133	133	180	184	358	358	133	135	195	199	150	150	126	130	192	192
1964	70	114	114	133	137	184	184	358	358	133	135	195	199	150	150	130	130	192	192
1971	70	110	114	137	143	184	184	358	358	135	135	195	197	150	150	126	130	192	200
2020	70	114	114	133	137	184	186	354	358	133	135	195	199	150	150	128	128	192	192
2025	70	110	110	143	143	184	186	354	358	135	135	195	195	150	150	126	130	192	200
2027	70	110	110	133	143	184	186	354	358	133	135	193	195	150	150	124	130	192	200
2028	70	110	110	137	137	186	188	358	358	135	135	195	199	150	150	124	132	192	192
2042	70	114	114	137	143	184	188	358	358	133	135	0	0	150	150	126	130	192	192
2066	70	110	114	137	143	180	180	354	358	135	135	191	199	150	150	130	130	192	192
2085	70	114	114	137	143	180	184	358	358	133	135	195	199	150	150	0	0	192	192
2092	70	110	114	137	143	184	188	354	354	135	135	195	199	150	150	126	130	192	192
2103	70	110	114	137	137	180	188	354	358	133	135	199	199	150	150	126	126	192	192
2111	70	110	114	133	137	184	184	354	358	121	121	195	197	148	150	128	130	0	0
2139	70	110	110	133	143	180	184	356	356	121	135	197	199	150	150	128	130	192	192
2148	70	110	114	133	137	180	184	354	358	135	135	195	195	150	150	126	126	192	192
2149	70	110	110	137	143	184	186	358	358	135	135	199	199	150	150	126	130	192	192
2151	70	112	114	137	143	180	186	358	358	135	135	195	199	150	150	124	130	192	192
2157	70	110	114	137	137	180	184	358	358	135	135	191	195	150	150	130	130	192	192
2165	70	114	114	133	133	186	186	358	358	135	135	195	199	150	150	130	130	192	192
2166	70	110	114	133	137	186	186	358	358	133	135	195	197	150	150	124	130	0	0
1673	80	114	114	133	137	184	188	358	358	121	133	195	199	150	150	130	130	200	200
1793	80	114	110	133	143	184	184	354	358	133	135	195	195	150	150	126	128	192	192
1807	80	110	114	133	137	184	186	354	358	135	135	195	197	150	150	130	130	192	192
1813	80	110	114	133	137	184	186	350	350	0	0	195	199	150	150	130	130	192	200
1847	80	110	114	137	137	184	188	358	358	135	135	195	195	150	150	124	130	192	192
1848	80	0	0	137	137	184	186	354	358	133	135	195	197	150	150	130	130	192	200
1924	80	110	114	133	137	184	184	358	358	133	135	195	195	150	150	130	130	192	192
1932	80	110	110	133	133	180	184	354	358	133	135	191	199	150	150	130	130	0	0
1974	80	110	114	133	137	180	184	354	358	133	135	195	199	150	150	130	130	192	192
1980	80	110	114	133	137	180	184	354	358	121	135	191	195	150	150	126	130	192	192
1981	80	110	114	133	133	184	186	354	358	133	135	195	195	150	150	128	130	192	192
2034	80	110	114	133	133	184	188	358	358	135	135	195	195	150	150	126	130	192	192
2040	80	114	114	133	143	184	184	354	354	133	135	195	199	150	150	130	130	0	0
2044	80	110	114	137	137	0	0	0	0	135	135	195	199	150	150	126	130	192	192
2045	80	110	114	133	137	180	184	358	358	133	135	191	191	150	150	126	126	192	200
2089	80	110	114	133	137	184	186	350	358	121	135	195	195	150	150	126	130	192	192
2102	80	110	114	133	137	180	184	354	358	133	135	195	199	150	150	126	130	192	192
2141	80	110	114	133	133	180	180	358	358	135	135	195	195	150	150	128	130	192	200
2188	80	114	114	137	143	180	186	358	358	135	135	195	195	150	150	128	130	192	192
2295	80	0	0	133	133	0	0	0	0	129	133	0	0	0	0	126	130	0	0
2716	80	114	114	133	143	184	184	354	356	135	135	195	197	150	150	130	130	192	192
2728	80	114	114	0	0	0	0	354	358	133	135	197	199	150	150	126	130	192	192
2741	80	110	114	0	0	184	184	354	358	0	0	195	201	150	150	128	130	192	200
2758	80	110	110	133	137	184	184	354	358	133	135	191	195	150	150	126	126	192	200
2763	80	114	114	133	143	180	184	354	358	0	0	0	0	150	150	130	130	192	192
2764	80	110	114	133	137	184	184	354	358	133	135	195	197	150	150	128	130	192	192
2783	80	0	0	133	137	0	0	358	358	0	0	0	0	150	150	126	130	192	192
2788	80	110	114	137	143	0	0	350	358	135	135	197	199	150	150	126	130	192	192
2791	80	114	114	133	143	186	186	354	358	121	135	195	195	150	150	124	130	192	192
2806	80	110	114	133	133	180	186	354	354	133	135	197	199	150	150	126	126	192	192
2807	80	110	110	137	143	184	184	358	358	133	135	191	195	150	150	126	130	192	200
2812	80	0	0	0	0	182	184	358	358	0	0	0	0	0	0	130	130	0	0
2818	80	110	114	133	133	184	188	358	358	135	135	195	199	150	150	126	130	192	200
2824	80	110	110	137	143	184	184	350	358	133	135	199	199	150	150	124	126	192	192
2826	80	110	114	137	137	180	184	356	358	133	133	195	199	150	150	126	128	192	192
2829	80	110	110	137	143	180	184	350	358	133	135	197	199	150	150	126	126	200	200
2830	80	0	0	133	133	0	0	0	0	131	133	0	0	0	0	130	130	0	0
2831	80	110	114	133	137	184	184	358	358	0	0	195	195	150	150	130	130	192	192
2832	80	114	114	133	133	184	184	354	354	0	0	199	199	150	150	0	0	192	192
2840	80	110	114	137	137	0	0	358	358	133	135	195	199	150	150	126	130	192	192
2843	80	110	114	137	137	0	0	354	358	133	135	195	199	150	150	126	130	192	192
2847	80	110	114	133	137	186	186	354	354	121	135	195	201	150	150	126	130	192	192
2848	80	110	114	133	143	184	184	354	358	131	135	195	195	150	150	130	130	192	192
2860	80	110	110	133	137	180	184	358	358	133	133	0	0	150	150	126	126	192	192
2881	80	110	114	133	143	182	182	354	358	133	135	195	199	150	150	128	130	192	200
2894	80	110	114	133	143	0	0	354	358	135	135	191	199	150	150	126	130	192	192
2895	80	110	110	133	133	184	184	354	354	133	135	0	0	150	150	130	130	192	192
2912	80	114	114	133	137	180	184	354	358	133	133	199	199	150	150	130	130	192	192
2922	80	114	114	137	143	188	188	350	354	135	135	195	195	150	150	124	130	192	192
2990	80	114	114	137	143	180	186	354	354	133	135	197	197	150	150	130	130	192	192
2699	90	110	114	133	133	184	184	354	358	133	135	195	199	150	150	126	130	192	192
2700	90	110	114	133	143	186	188	354	358	133	135	197	199	150	150	128	130	192	192
2701	90	110	110	137	143	180	184	358	358	135	137	199	199	150	150	126	130	192	192
2705	90	110	114	133	137	180	184	354	358	133	135	195	195	150	150	124	130	192	192
2706	90	114	114	137	137	186	186	0	0	121	135	195	199	150	150	130	130	192	200
2722	90	110	114	137	137	0	0	358	358	135	135	195	199	150	150	130	130	192	192
2727	90	110	114	133	133	184	184	358	358	133	135	195	199	150	150	128	130	192	192
2729	90	108	110	133	137	180	180	354	358	135	135	0	0	150	150	124	130	190	192
2730	90	110	114	133	143	184	186	0	0	135	135	195	199	150	150	126	130	190	192
2735	90	110	110	143	143	180	188	354	358	135	135	195	195	150	150	126	130	192	192
2736	90	110	114	133	133	180	188	354	358	0	0	195	195	150	150	130	130	192	192
2739	90	0	0	133	137	0	0	354	358	133	137	195	195	150	150	130	130	192	192
2740	90	110	114	137	137	184	188	358	358	133	135	191	199	150	150	128	130	192	192
2744	90	110	110	133	137.5	184	184	354	354	133	133	195	195	150	150	130	130	192	192
2746	90	110	110	133	137.33	184	184	358	358	135	135	191	199	150	150	128	128	192	192
2749	90	0	0	133	133	184	184	354	358	133	135	0	0	150	150	126	126	190	192
2751	90	110	114	137	143	184	186	358	358	135	135	195	195	150	150	124	130	192	192
2752	90	110	110	133	143	180	184	354	358	131	135	195	199	150	150	124	126	192	200
2754	90	110	114	137	137	180	186	354	358	0	0	195	199	150	150	124	130	192	192
2755	90	110	110	135	137	184	188	358	358	121	135	195	199	150	150	126	130	192	192
2760	90	110	114	133	133	180	184	350	354	133	135	199	199	150	150	128	130	190	192
2766	90	110	114	133	137	186	188	354	358	135	135	195	199	150	150	126	130	192	192
2770	90	110	114	133	133	184	186	350	358	121	133	195	197	150	150	126	130	192	192
2778	90	110	114	133	137	180	184	358	358	133	135	195	195	150	150	124	130	192	192
2779	90	110	114	133	137	180	180	354	358	133	135	195	199	150	150	126	130	192	200
2782	90	114	114	137	137	184	184	358	358	135	135	195	199	150	150	128	130	192	200
2792	90	114	114	137	143	184	184	358	358	133	135	195	199	150	150	124	130	192	192
2810	90	114	114	137	137	180	184	358	358	133	135	191	195	150	150	126	128	192	192
2821	90	114	114	133	137	184	186	354	358	121	135	195	199	150	150	126	130	192	192
2839	90	110	114	133	137	184	188	358	358	133	135	195	199	150	150	126	128	192	192
2858	90	110	110	133	137	180	180	354	358	133	133	195	199	150	150	126	130	192	192
2859	90	110	110	133	137	180	184	358	358	133	135	195	197	150	150	126	130	192	192
2863	90	110	110	137	137	0	0	354	354	133	135	195	195	150	150	126	126	192	192
2864	90	110	114	133	143	184	186	358	358	133	135	195	199	150	150	126	130	192	192
2868	90	110	114	137	137	180	184	358	358	127	135	199	199	150	150	126	130	192	192
2876	90	114	114	133	137	184	184	354	358	133	135	195	199	150	150	126	128	192	192
2889	90	110	114	0	0	0	0	354	354	133	135	0	0	150	150	126	130	190	192
2930	90	110	114	133	133	186	186	354	358	133	135	191	195	150	150	128	130	192	192
2937	90	110	114	133	137	180	186	350	354	135	135	195	199	150	150	130	130	192	200
2975	90	110	114	133	143	0	0	358	358	0	0	195	197	150	150	130	130	192	192
2976	90	0	0	133	143	0	0	358	358	135	135	195	199	150	150	126	130	192	192
2988	90	110	114	133	137	184	184	358	358	133	135	189	199	150	150	126	128	192	192
2989	90	110	114	143	143	180	184	358	358	0	0	195	197	150	150	128	128	192	192
2991	90	110	110	133	137	0	0	0	0	135	137	195	199	150	150	126	126	190	192
2993	90	110	114	133	137	180	184	0	0	0	0	199	199	150	150	126	126	190	192
2999	90	0	0	133	139	180	184	352	352	131	131	199	199	0	0	126	126	192	192
3880	90	110	114	137	137	184	184	354	354	0	0	195	195	150	150	124	126	192	192
4110	90	110	114	133	133	182	182	350	354	133	133	199	199	150	150	0	0	192	192
4151	90	114	114	133	137	0	0	358	358	0	0	0	0	0	0	126	130	0	0
4159	90	114	114	0	0	184	184	354	354	133	135	195	195	150	150	0	0	192	200
3605	2000	110	110	133	143	184	188	354	358	135	135	195	199	150	150	126	130	192	192
3717	2000	110	114	133	143	184	188	0	0	131	131	195	195	150	150	126	130	192	192
3721	2000	110	110	133	137	184	184	354	354	135	135	197	199	150	150	126	130	192	200
3724	2000	110	110	137	143	184	184	354	354	133	135	195	195	150	150	124	130	192	200
3728	2000	110	110	133	133	180	180	354	354	135	135	199	199	150	150	128	130	192	192
3732	2000	110	110	133	137	186	186	354	358	133	135	199	199	150	150	124	124	192	192
3733	2000	110	110	0	0	180	184	358	358	133	135	195	199	150	150	126	130	0	0
3735	2000	0	0	137	137	184	184	356	358	133	133	0	0	150	150	126	130	192	192
3777	2000	110	110	133	133	180	184	354	358	133	133	195	197	150	150	130	130	192	192
3781	2000	0	0	137	137	0	0	358	358	133	135	0	0	148	150	0	0	0	0
3816	2000	110	110	137	143	180	184	354	354	133	135	195	195	150	150	126	130	192	192
3838	2000	114	114	131	137	184	186	358	358	135	135	195	199	0	0	126	130	192	200
3845	2000	110	114	133	137	180	184	354	358	133	135	195	195	150	150	130	130	192	192
3850	2000	110	114	137	143	180	186	358	358	131	135	195	199	150	150	126	130	192	192
3871	2000	110	114	133	137	180	180	354	358	135	135	195	199	150	150	126	130	192	192
3893	2000	114	114	137	143	180	184	358	358	129	135	195	197	150	150	126	130	192	192
3926	2000	114	114	131	133	184	184	354	358	121	135	195	199	150	150	130	130	192	192
3929	2000	110	114	133	137	180	180	354	358	133	135	195	201	150	150	130	130	192	192
3932	2000	110	114	133	133	180	184	358	358	133	135	195	199	150	150	126	130	192	192
3933	2000	114	114	0	0	180	188	356	358	121	135	195	197	150	150	126	126	192	192
3939	2000	114	114	0	0	184	184	358	358	133	135	191	195	150	150	126	126	192	192
3941	2000	114	114	137	143	184	188	354	358	135	135	191	199	150	150	130	130	192	192
3951	2000	110	114	133	143	180	184	354	354	133	135	195	197	150	150	130	130	192	192
3969	2000	110	114	143	143	180	188	358	358	121	135	195	197	150	150	128	130	192	192
4001	2000	110	114	133	133	184	184	358	358	131	135	197	199	150	150	124	130	192	192
4018	2000	110	110	137	143	184	186	350	354	133	135	0	0	150	150	130	130	192	200
4047	2000	110	110	137	143	178	182	354	358	133	135	195	199	150	150	126	130	192	192
4051	2000	110	110	133	133	184	186	354	354	133	135	195	197	150	150	124	128	192	192
4053	2000	114	114	137	143	180	186	354	354	135	135	197	199	150	150	130	130	192	192
4058	2000	110	110	137	143	180	184	358	358	133	135	195	197	150	150	126	130	192	192
4059	2000	110	114	133	143	180	186	358	358	133	135	197	199	150	150	128	130	192	200
4063	2000	114	114	133	137	180	180	358	358	0	0	195	195	150	150	130	130	192	192
4090	2000	0	0	133	137	184	184	0	0	0	0	0	0	150	150	130	130	190	192
4127	2000	110	114	0	0	188	188	354	354	135	135	195	199	0	0	126	130	0	0
4162	2000	114	114	133	133	180	184	354	354	135	135	195	195	150	150	126	130	192	200
4168	2000	110	114	133	133	184	186	354	358	133	133	195	199	150	150	130	130	192	192
4195	2000	114	114	133	137	184	188	354	358	135	135	195	199	150	150	126	130	192	192
4205	2000	114	114	133	137	180	184	354	354	135	135	199	199	0	0	126	130	0	0
4206	2000	110	110	137	137	184	184	354	358	133	135	199	199	150	150	128	130	192	192
4273	2000	110	110	133	137	186	186	358	358	135	135	195	199	150	150	130	130	192	200
4310	2000	110	114	133	143	180	184	0	0	135	135	191	195	150	150	126	130	192	192
4320	2000	114	114	133	137	180	184	0	0	133	135	195	195	150	150	124	130	192	192
4324	2000	114	114	139	143	180	184	350	358	133	133	191	195	150	152	126	130	192	192
4326	2000	114	114	137	143	184	184	358	358	135	135	195	199	150	150	130	130	192	192
4328	2000	110	114	133	133	180	184	358	358	135	135	195	197	150	150	128	130	192	192

## Sheet: mtDNA
Sample Period	Id	sequence
00-05	3845	AGCCCCACTATCAACACCCAAAGCTGAAGTTCTATTTATACTATTCCCTGGCGCATATTAATATAGTTCCACAAAATTCAAGAACCTTATCAGTATTAAATTCTTAAAAATCTTTAACAATTTAATACAGTTTTGTACTCAACAGCCATATTAATATTTCATATACCATTAATTACACTAAGTACATAATGATTTATATGCATCAGTACTCCATACGGGTATAGTACATAACATTAATGTATCAAGACATATTATGTATAATAGTACATTACACTATTTACCCCATGCTTATAAGCAAGTACATGACATTATTAATAGTACATAGTACATATTATTATTGATCGTACATAGCACATTATGTCAAATCCATTCTTGTCAACATGCGTATCCCGTCCATTA…
00-05	3850	AGTGCATGGGCCCGGAGCGAGAAGAGGGATCCTTGCCAAGCGGGTTGTTGGTTTCACGCGGCATGGTAATTAAGCTCGTGATCTAATGGACGGGATACGCATGTTGACAAGAATGGATTTGACATAATGTGCTATGTACGATCAATAATAATATGTACTATGTACTATTAATAATGTCATGTACTTGCTTATAAGCATGGGGTAAATAGTGTAATGTACTATTATACATAATATGTCTTGATACATTAATGTTATGTACTATACCCGTATGGAGTACTGATGCATATAAATCATTATGTACTTAGTGTAATTAATGGTATATGAAATATTAATATGGCTGTTGAGTACAAAACTGTATTAAATTGTTAAAGATTTTTAAGAATTTAATACTGATAAGGT…
00-05	4195	GCATGGGCCCGGAGCGAGAAGAGGGATCCTTGCCAAGCGGGTTGTTGGTTTCACGCGGCATGGTAATTAAGCTCGTGATCTAATGGACGGGATACGCATGTTGACAAGAATGGATTTGACATAATGTGCTATGTACGATCAATAATAATATGTACTATGTACTATTAATAATGTCATGTACTTGCTTATAAGCATGGGGTAAATAGTGTAATGTACTATTATACATAATATGTCTTGATACATTAATGTTATGTACTATACCCGTATGGAGTACTGATGCATATAAATCATTATGTACTTAGTGTAATTAATGGTATATGAAATATTAATATGGCTGTTGAGTACAAAACTGTATTAAATTGTTAAAGATTTTTAAGAATTTAATACTGATAAGGTTCT…
00-05	3717	AGCCCCACTATCAACACCCAAAGCTGAAGTTCTATTTAAACTATTCCCTGGCGCATATTAATATAGTTCCACAAAATTCAAGAACCTTATCAGTATTAAATTCTTAAAAATCTTTAACAATTTAATACAGTTTTGTACTCAACAGCCATATTAATATTTCATATACCATTAATTACACTAAGTACATAATGATTTATATGCATCAGTACTCCATACGGGTATAGTACATAACATTAATGTATCAAGACATATTATGTATAATAGTACATTACACTATTTACCCCATGCTTATAAGCAAGTACATGACATTATTAATAGTACATAGTACATATTATTATTGATCGTACATAGCACATTATGTCAAATCCATTCTTGTCAACATGCGTATCCCGTCCATTA…
00-05	3721	AGCCCCACTATCAACACCCAAAGCTGAAGTTCTATTTAAACTATTCCCTGGCGCATATTAATATAGTTCCACAAAATTCAAGAACCTTATCAGTATTAAATTCTTAAAAATCTTTAACAATTTAATACAGTTTTGTACTCAACAGCCATATTAATATTTCATATACCATTAATTACACTAAGTACATAATGATTTATATGCATCAGTACTCCATACGGGTATAGTACATAACATTAATGTATCAAGACATATTATGTATAATAGTACATTACACTATTTACCCCATGCTTATAAGCAAGTACATGACATTATTAATAGTACATAGTACATATTATTATTGATCGTACATAGCACATTATGTCAAATCCATTCTTGTCAACATGCGTATCCCGTCCATTA…
00-05	3733	AGCCCCACTATCAACACCCAAAGCTGAAGTTCTATTTAAACTATTCCCTGGCGCATATTAATATAGTTACACAAAATTCAAGAACCTTATCAGTATTAAATTCTTAAAAATCTTTAACAATTTAATACAGTTTTGTACTCAACAGCCATATTAATATTTCATATACCATTAATTACACTAAGTACATAATGATTTATATGCATCAGTACTCCATACGGGTATAGTACATAACATTAATGTATCAAGACATATTATGTATAATAGTACATTACACTATTTACCCCATGCTTATAAGCAAGTACATGACATTATTAATAGTACATAGTACATATTATTATTGATCGTACATAGCACATTATGTCAAATCCATTCTTGTCAACATGCGTATCCCGTCCATTA…
00-05	3735	AGCCCCACTATCAACACCCAAAGCTGAAGTTCTATTTAAACTATTCCCTGGCGCATATTAATATAGTTACACAAAATTCAAGAACCTTATCAGTATTAAATTCTTAAAAATCTTTAACAATTTAATACAGTTTTGTACTCAACAGCCATATTAATATTTCATATACCATTAATTACACTAAGTACATAATGATTTATATGCATCAGTACTCCATACGGGTATAGTACATAACATTAATGTATCAAGACATATTATGTATAATAGTACATTACACTATTTACCCCATGCTTATAAGCAAGTACATGACATTATTAATAGTACATAGTACATATTATTATTGATCGTACATAGCACATTATGTCAAATCCATTCTTGTCAACATGCGTATCCCGTCCATTA…
00-05	3816	AGCCCCACTATCAACACCCAAAGCTGAAGTTCTATTTAAACTATTCCCTGGCGCATATTAATATAGTTCCACAAAATTCAAGAACCTTATCAGTATTAAATTCTTAAAAATCTTTAACAATTTAATACAGTTTTGTACTCAACAGCCATATTAATATTTCATATACCATTAATTACACTAAGTACATAATGATTTATATGCATCAGTACTCCATACGGGTATAGTACATAACATTAATGTATCAAGACATATTATGTATAATAGTACATTACACTATTTACCCCATGCTTATAAGCAAGTACATGACATTATTAATAGTACATAGTACATATTATTATTGATCGTACATAGCACATTATGTCAAATCCATTCTTGTCAACATGCGTATCCCGTCCATTA…
00-05	3850	AGCCCCACTATCAACACCCAAAGCTGAAGTTCTATTTAAACTATTCCCTGGCGCATATTAATATAGTTCCACAAAATTCAAGAACCTTATCAGTATTAAATTCTTAAAAATCTTTAACAATTTAATACAGTTTTGTACTCAACAGCCATATTAATATTTCATATACCATTAATTACACTAAGTACATAATGATTTATATGCATCAGTACTCCATACGGGTATAGTACATAACATTAATGTATCAAGACATATTATGTATAATAGTACATTACACTATTTACCCCATGCTTATAAGCAAGTACATGACATTATTAATAGTACATAGTACATATTATTATTGATCGTACATAGCACATTATGTCAAATCCATTCTTGTCAACATGCGTATCCCGTCCATTA…
00-05	3893	AGCCCCACTATCAACACCCAAAGCTGAAGTTCTATTTAAACTATTCCCTGGCGCATATTAATATAGTTACACAAAATTCAAGAACCTTATCAGTATTAAATTCTTAAAAATCTTTAACAATTTAATACAGTTTTGTACTCAACAGCCATATTAATATTTCATATACCATTAATTACACTAAGTACATAATGATTTATATGCATCAGTACTCCATACGGGTATAGTACATAACATTAATGTATCAAGACATATTATGTATAATAGTACATTACACTATTTACCCCATGCTTATAAGCAAGTACATGACATTATTAATAGTACATAGTACATATTATTATTGATCGTACATAGCACATTATGTCAAATCCATTCTTGTCAACATGCGTATCCCGTCCATTA…
00-05	3922	AGCCCCACTATCAACACCCAAAGCTGAAGTTCTATTTAAACTATTCCCTGGCGCATATTAATATAGTTCCACAAAATTCAAGAACCTTATCAGTATTAAATTCTTAAAAATCTTTAACAATTTAATACAGTTTTGTACTCAACAGCCATATTAATATTTCATATACCATTAATTACACTAAGTACATAATGATTTATATGCATCAGTACTCCATACGGGTATAGTACATAACATTAATGTATCAAGACATATTATGTATAATAGTACATTACACTATTTACCCCATGCTTATAAGCAAGTACATGACATTATTAATAGTACATAGTACATATTATTATTGATCGTACATAGCACATTATGTCAAATCCATTCTTGTCAACATGCGTATCCCGTCCATTA…
00-05	3929	AGCCCCACTATCAACACCCAAAGCTGAAGTTCTATTTAAACTATTCCCTGGCGCATATTAATATAGTTCCACAAAATTCAAGAACCTTATCAGTATTAAATTCTTAAAAATCTTTAACAATTTAATACAGTTTTGTACTCAACAGCCATATTAATATTTCATATACCATTAATTACACTAAGTACATAATGATTTATATGCATCAGTACTCCATACGGGTATAGTACATAACATTAATGTATCAAGACATATTATGTATAATAGTACATTACACTATTTACCCCATGCTTATAAGCAAGTACATGACATTATTAATAGTACATAGTACATATTATTATTGATCGTACATAGCACATTATGTCAAATCCATTCTTGTCAACATGCGTATCCCGTCCATTA…
00-05	3939	AGCCCCACTATCAACACCCAAAGCTGAAGTTCTATTTAAACTATTCCCTGGCGCATATTAATATAGTTACACAAAATTCAAGAACCTTATCAGTATTAAATTCTTAAAAATCTTTAACAATTTAATACAGTTTTGTACTCAACAGCCATATTAATATTTCATATACCATTAATTACACTAAGTACATAATGATTTATATGCATCAGTACTCCATACGGGTATAGTACATAACATTAATGTATCAAGACATATTATGTATAATAGTACATTACACTATTTACCCCATGCTTATAAGCAAGTACATGACATTATTAATAGTACATAGTACATATTATTATTGATCGTACATAGCACATTATGTCAAATCCATTCTTGTCAACATGCGTATCCCGTCCATTA…
00-05	3951	AGCCCCACTATCAACACCCAAAGCTGAAGTTCTATTTAAACTATTCCCTGGCGCATATTAATATAGTTACACAAAATTCAAGAACCTTATCAGTATTAAATTCTTAAAAATCTTTAACAATTTAATACAGTTTTGTACTCAACAGCCATATTAATATTTCATATACCATTAATTACACTAAGTACATAATGATTTATATGCATCAGTACTCCATACGGGTATAGTACATAACATTAATGTATCAAGACATATTATGTATAATAGTACATTACACTATTTACCCCATGCTTATAAGCAAGTACATGACATTATTAATAGTACATAGTACATATTATTATTGATCGTACATAGCACATTATGTCAAATCCATTCTTGTCAACATGCGTATCCCGTCCATTA…
00-05	3962	AGCCCCACTATCAACACCCAAAGCTGAAGTTCTATTTAAACTATTCCCTGGCGCATATTAATATAGTTACACAAAATTCAAGAACCTTATCAGTATTAAATTCTTAAAAATCTTTAACAATTTAATACAGTTTTGTACTCAACAGCCATATTAATATTTCATATACCATTAATTACACTAAGTACATAATGATTTATATGCATCAGTACTCCATACGGGTATAGTACATAACATTAATGTATCAAGACATATTATGTATAATAGTACATTACACTATTTACCCCATGCTTATAAGCAAGTACATGACATTATTAATAGTACATAGTACATATTATTATTGATCGTACATAGCACATTATGTCAAATCCATTCTTGTCAACATGCGTATCCCGTCCATTA…
00-05	3969	CCACAAAATTCAAGAACCTTATCAGTATTAAATTCTTAAAAATCTTTAACAATTTAATACAGTTTTGTACTCAACAGCCATATTAATATTTCATATACCATTAATTACACTAAGTACATAATGATTTATATGCATCAGTACTCCATACGGGTATAGTACATAACATTAATGTATCAAGACATATTATGTATAATAGTACATTACACTATTTACCCCATGCTTATAAGCAAGTACATGACATTATTAATAGTACATAGTACATATTATTATTGATCGTACATAGCACATTATGTCAAATCCATTCTTGTCAACATGCGTATCCCGTCCATTAGATCACGAGCTTAATTACCATGCCGCGTGAAACCAACAACCCGCTTGGCAAGGATCCCTCTTCTCGCT…
00-05	4058	AGCCCCACTATCAACACCCAAAGCTGAAGTTCTATTTAAACTATTCCCTGGCGCATATTAATATAGTTCCACAAAATTCAAGAACCTTATCAGTATTAAATTCTTAAAAATCTTTAACAATTTAATACAGTTTTGTACTCAACAGCCATATTAATATTTCATATACCATTAATTACACTAAGTACATAATGATTTATATGCATCAGTACTCCATACGGGTATAGTACATAACATTAATGTATCAAGACATATTATGTATAATAGTACATTACACTATTTACCCCATGCTTATAAGCAAGTACATGACATTATTAATAGTACATAGTACATATTATTATTGATCGTACATAGCACATTATGTCAAATCCATTCTTGTCAACATGCGTATCCCGTCCATTA…
00-05	4063	AGCCCCACTATCAACACCCAAAGCTGAAGTTCTATTTAAACTATTCCCTGGCGCATATTAATATAGTTCCACAAAATTCAAGAACCTTATCAGTATTAAATTCTTAAAAATCTTTAACAATTTAATACAGTTTTGTACTCAACAGCCATATTAATATTTCATATACCATTAATTACACTAAGTACATAATGATTTATATGCATCAGTACTCCATACGGGTATAGTACATAACATTAATGTATCAAGACATATTATGTATAATAGTACATTACACTATTTACCCCATGCTTATAAGCAAGTACATGACATTATTAATAGTACATAGTACATATTATTATTGATCGTACATAGCACATTATGTCAAATCCATTCTTGTCAACATGCGTATCCCGTCCATTA…
00-05	4080	CCACAAAATTCAAGAACCTTATCAGTATTAAATTCTTAAAAATCTTTAACAATTTAATACAGTTTTGTACTCAACAGCCATATTAATATTTCATATACCATTAATTACACTAAGTACATAATGATTTATATGCATCAGTACTCCATACGGGTATAGTACATAACATTAATGTATCAAGACATATTATGTATAATAGTACATTACACTATTTACCCCATGCTTATAAGCAAGTACATGACATTATTAATAGTACATAGTACATATTATTATTGATCGTACATAGCACATTATGTCAAATCCATTCTTGTCAACATGCGTATCCCGTCCATTAGATCACGAGCTTAATTACCATGCCGCGTGAAACCAACAACCCGCTTGGCAAGGATCCCTCTTCTCGCT…
00-05	4168	AGCCCCACTATCAACACCCAAAGCTGAAGTTCTATTTAAACTATTCCCTGGCGCATATTAATATAGTTACACAAAATTCAAGAACCTTATCAGTATTAAATTCTTAAAAATCTTTAACAATTTAATACAGTTTTGTACTCAACAGCCATATTAATATTTCATATACCATTAATTACACTAAGTACATAATGATTTATATGCATCAGTACTCCATACGGGTATAGTACATAACATTAATGTATCAAGACATATTATGTATAATAGTACATTACACTATTTACCCCATGCTTATAAGCAAGTACATGACATTATTAATAGTACATAGTACATATTATTATTGATCGTACATAGCACATTATGTCAAATCCATTCTTGTCAACATGCGTATCCCGTCCATTA…
00-05	4205	CCACAAAATTCAAGAACCTTATCAGTATTAAATTCTTAAAAATCTTTAACAATTTAATACAGTTTTGTACTCAACAGCCATATTAATATTTCATATACCATTAATTACACTAAGTACATAATGATTTATATGCATCAGTACTCCATACGGGTATAGTACATAACATTAATGTATCAAGACATATTATGTATAATAGTACATTACACTATTTACCCCATGCTTATAAGCAAGTACATGACATTATTAATAGTACATAGTACATATTATTATTGATCGTACATAGCACATTATGTCAAATCCATTCTTGTCAACATGCGTATCCCGTCCATTAGATCACGAGCTTAATTACCATGCCGCGTGAAACCAACAACCCGCTTGGCAAGGATCCCTCTTCTCGCT…
00-05	4206	AGCCCCACTATCAACACCCAAAGCTGAAGTTCTATTTAAACTATTCCCTGGCGCATATTAATATAGTTACACAAAATTCAAGAACCTTATCAGTATTAAATTCTTAAAAATCTTTAACAATTTAATACAGTTTTGTACTCAACAGCCATATTAATATTTCATATACCATTAATTACACTAAGTACATAATGATTTATATGCATCAGTACTCCATACGGGTATAGTACATAACATTAATGTATCAAGACATATTATGTATAATAGTACATTACACTATTTACCCCATGCTTATAAGCAAGTACATGACATTATTAATAGTACATAGTACATATTATTATTGATCGTACATAGCACATTATGTCAAATCCATTCTTGTCAACATGCGTATCCCGTCCATTA…
60-65	333	AGCCCCACTATCAACACCCAAAGCTGAAGTTCTATTTAAACTATTCCCTGGCGCATATTAATATAGTTACACAAAATTCAAGAACCTTATCAGTATTAAATTCTTAAAAATCTTTAACAATTTAATACAGTTTTGTACTCAACAGCCATATTAATATTTCATATACCATTAATTACACTAAGTACATAATGATTTATATGCATCAGTACTCCATACGGGTATAGTACATAACATTAATGTATCAAGACATATTATGTATAATAGTACATTACACTATTTACCCCATGCTTATAAGCAAGTACATGACATTATTAATAGTACATAGTACATATTATTATTGATCGTACATAGCACATTATGTCAAATCCATTCTTGTCAACATGCGTATCCCGTCCATTA…
60-65	212	AGCCCCACTATCAACACCCAAAGCTGAAGTTCTATTTAAACTATTCCCTGGCGCATATTAATATAGTTACACAAAATTCAAGAACCTTATCAGTATTAAATTCTTAAAAATCTTTAACAATTTAATACAGTTTTGTACTCAACAGCCATATTAATATTTCATATACCATTAATTACACTAAGTACATAATGATTTATATGCATCAGTACTCCATACGGGTATAGTACATAACATTAATGTATCAAGACATATTATGTATAATAGTACATTACACTATTTACCCCATGCTTATAAGCAAGTACATGACATTATTAATAGTACATAGTACATATTATTATTGATCGTACATAGCACATTATGTCAAATCCATTCTTGTCAACATGCGTATCCCGTCCATTA…
60-65	239	AGCCCCACTATCAACACCCAAAGCTGAAGTTCTATTTAAACTATTCCCTGGCGCATATTAATATAGTTACACAAAATTCAAGAACCTTATCAGTATTAAATTCTTAAAAATCTTTAACAATTTAATACAGTTTTGTACTCAACAGCCATATTAATATTTCATATACCATTAATTACACTAAGTACATAATGATTTATATGCATCAGTACTCCATACGGGTATAGTACATAACATTAATGTATCAAGACATATTATGTATAATAGTACATTACACTATTTACCCCATGCTTATAAGCAAGTACATGACATTATTAATAGTACATAGTACATATTATTATTGATCGTACATAGCACATTATGTCAAATCCATTCTTGTCAACATGCGTATCCCGTCCATTA…
60-65	301	AGCCCCACTATCAACACCCAAAGCTGAAGTTCTATTTAAACTATTCCCTGGCGCATATTAATATAGTTACACAAAATTCAAGAACCTTATCAGTATTAAATTCTTAAAAATCTTTAACAATTTAATACAGTTTTGTACTCAACAGCCATATTAATATTTCATATACCATTAATTACACTAAGTACATAATGATTTATATGCATCAGTACTCCATACGGGTATAGTACATAACATTAATGTATCAAGACATATTATGTATAATAGTACATTACACTATTTACCCCATGCTTATAAGCAAGTACATGACATTATTAATAGTACATAGTACATATTATTATTGATCGTACATAGCACATTATGTCAAATCCATTCTTGTCAACATGCGTATCCCGTCCATTA…
60-65	326	AGCCCCACTATCAACACCCAAAGCTGAAGTTCTATTTAAACTATTCCCTGGCGCATATTAATATAGTTACACAAAATTCAAGAACCTTATCAGTATTAAATTCTTAAAAATCTTTAACAATTTAATACAGTTTTGTACTCAACAGCCATATTAATATTTCATATACCATTAATTACACTAAGTACATAATGATTTATATGCATCAGTACTCCATACGGGTATAGTACATAACATTAATGTATCAAGACATATTATGTATAATAGTACATTACACTATTTACCCCATGCTTATAAGCAAGTACATGACATTATTAATAGTACATAGTACATATTATTATTGATCGTACATAGCACATTATGTCAAATCCATTCTTGTCAACATGCGTATCCCGTCCATTA…
60-65	410	AGCCCCACTATCAACACCCAAAGCTGAAGTTCTATTTAAACTATTCCCTGGCGCATATTAATATAGTTACACAAAATTCAAGAACCTTATCAGTATTAAATTCTTAAAAATCTTTAACAATTTAATACAGTTTTGTACTCAACAGCCATATTAATATTTCATATACCATTAATTACACTAAGTACATAATGATTTATATGCATCAGTACTCCATACGGGTATAGTACATAACATTAATGTATCAAGACATATTATGTATAATAGTACATTACACTATTTACCCCATGCTTATAAGCAAGTACATGACATTATTAATAGTACATAGTACATATTATTATTGATCGTACATAGCACATTATGTCAAATCCATTCTTGTCAACATGCGTATCCCGTCCATTA…
60-65	411	AGCCCCACTATCAACACCCAAAGCTGAAGTTCTATTTAAACTATTCCCTGGCGCATATTAATATAGTTCCACAAAATTCAAGAACCTTATCAGTATTAAATTCTTAAAAATCTTTAACAATTTAATACAGTTTTGTACTCAACAGCCATATTAATATTTCATATACCATTAATTACACTAAGTACATAATGATTTATATGCATCAGTACTCCATACGGGTATAGTACATAACATTAATGTATCAAGACATATTATGTATAATAGTACATTACACTATTTACCCCATGCTTATAAGCAAGTACATGACATTATTAATAGTACATAGTACATATTATTATTGATCGTACATAGCACATTATGTCAAATCCATTCTTGTCAACATGCGTATCCCGTCCATTA…
60-65	416	AGCCCCACTATCAACACCCAAAGCTGAAGTTCTATTTAAACTATTCCCTGGCGCATATTAATATAGTTACACAAAATTCAAGAACCTTATCAGTATTAAATTCTTAAAAATCTTTAACAATTTAATACAGTTTTGTACTCAACAGCCATATTAATATTTCATATACCATTAATTACACTAAGTACATAATGATTTATATGCATCAGTACTCCATACGGGTATAGTACATAACATTAATGTATCAAGACATATTATGTATAATAGTACATTACACTATTTACCCCATGCTTATAAGCAAGTACATGACATTATTAATAGTACATAGTACATATTATTATTGATCGTACATAGCACATTATGTCAAATCCATTCTTGTCAACATGCGTATCCCGTCCATTA…
60-65	418	CCACAAAATTCAAGAACCTTATCAGTATTAAATTCTTAAAAATCTTTAACAATTTAATACAGTTTTGTACTCAACAGCCATATTAATATTTCATATACCATTAATTACACTAAGTACATAATGATTTATATGCATCAGTACTCCATACGGGTATAGTACATAACATTAATGTATCAAGACATATTATGTATAATAGTACATTACACTATTTACCCCATGCTTATAAGCAAGTACATGACATTATTAATAGTACATAGTACATATTATTATTGATCGTACATAGCACATTATGTCAAATCCATTCTTGTCAACATGCGTATCCCGTCCATTAGATCACGAGCTTAATTACCATGCCGCGTGAAACCAACAACCCGCTTGGCAAGGATCCCTCTTCTCGCT…
60-65	427	AGCCCCACTATCAACACCCAAAGCTGAAGTTCTATTTAAACTATTCCCTGGCGCATATTAATATAGTTCCACAAAATTCAAGAACCTTATCAGTATTAAATTCTTAAAAATCTTTAACAATTTAATACAGTTTTGTACTCAACAGCCATATTAATATTTCATATACCATTAATTACACTAAGTACATAATGATTTATATGCATCAGTACTCCATACGGGTATAGTACATAACATTAATGTATCAAGACATATTATGTATAATAGTACATTACACTATTTACCCCATGCTTATAAGCAAGTACATGACATTATTAATAGTACATAGTACATATTATTATTGATCGTACATAGCACATTATGTCAAATCCATTCTTGTCAACATGCGTATCCCGTCCATTA…
60-65	665	AGCCCCACTATCAACACCCAAAGCTGAAGTTCTATTTAAACTATTCCCTGGCGCATATTAATATAGTTCCACAAAATTCAAGAACCTTATCAGTATTAAATTCTTAAAAATCTTTAACAATTTAATACAGTTTTGTACTCAACAGCCATATTAATATTTCATATACCATTAATTACACTAAGTACATAATGATTTATATGCATCAGTACTCCATACGGGTATAGTACATAACATTAATGTATCAAGACATATTATGTATAATAGTACATTACACTATTTACCCCATGCTTATAAGCAAGTACATGACATTATTAATAGTACATAGTACATATTATTATTGATCGTACATAGCACATTATGTCAAATCCATTCTTGTCAACATGCGTATCCCGTCCATTA…
60-65	702	AGCCCCACTATCAACACCCAAAGCTGAAGTTCTATTTAAACTATTCCCTGGCGCATATTAATATAGTTACACAAAATTCAAGAACCTTATCAGTATTAAATTCTTAAAAATCTTTAACAATTTAATACAGTTTTGTACTCAACAGCCATATTAATATTTCATATACCATTAATTACACTAAGTACATAATGATTTATATGCATCAGTACTCCATACGGGTATAGTACATAACATTAATGTATCAAGACATATTATGTATAATAGTACATTACACTATTTACCCCATGCTTATAAGCAAGTACATGACATTATTAATAGTACATAGTACATATTATTATTGATCGTACATAGCACATTATGTCAAATCCATTCTTGTCAACATGCGTATCCCGTCCATTA…
60-65	706	CCACAAAATTCAAGAACCTTATCAGTATTAAATTCTTAAAAATCTTTAACAATTTAATACAGTTTTGTACTCAACAGCCATATTAATATTTCATATACCATTAATTACACTAAGTACATAATGATTTATATGCATCAGTACTCCATACGGGTATAGTACATAACATTAATGTATCAAGACATATTATGTATAATAGTACATTACACTATTTACCCCATGCTTATAAGCAAGTACATGACATTATTAATAGTACATAGTACATATTATTATTGATCGTACATAGCACATTATGTCAAATCCATTCTTGTCAACATGCGTATCCCGTCCATTAGATCACGAGCTTAATTACCATGCCGCGTGAAACCAACAACCCGCTTGGCAAGGATCCCTCTTCTCGCT…
60-65	726	AGCCCCACTATCAACACCCAAAGCTGAAGTTCTATTTAAACTATTCCCTGGCGCATATTAATATAGTTACACAAAATTCAAGAACCTTATCAGTATTAAATTCTTAAAAATCTTTAACAATTTAATACAGTTTTGTACTCAACAGCCATATTAATATTTCATATACCATTAATTACACTAAGTACATAATGATTTATATGCATCAGTACTCCATACGGGTATAGTACATAACATTAATGTATCAAGACATATTATGTATAATAGTACATTACACTATTTACCCCATGCTTATAAGCAAGTACATGACATTATTAATAGTACATAGTACATATTATTATTGATCGTACATAGCACATTATGTCAAATCCATTCTTGTCAACATGCGTATCCCGTCCATTA…
60-65	740	AGCCCCACTATCAACACCCAAAGCTGAAGTTCTATTTAAACTATTCCCTGGCGCATATTAATATAGTTCCACAAAATTCAAGAACCTTATCAGTATTAAATTCTTAAAAATCTTTAACAATTTAATACAGTTTTGTACTCAACAGCCATATTAATATTTCATATACCATTAATTACACTAAGTACATAATGATTTATATGCATCAGTACTCCATACGGGTATAGTACATAACATTAATGTATCAAGACATATTATGTATAATAGTACATTACACTATTTACCCCATGCTTATAAGCAAGTACATGACATTATTAATAGTACATAGTACATATTATTATTGATCGTACATAGCACATTATGTCAAATCCATTCTTGTCAACATGCGTATCCCGTCCATTA…
60-65	1226	CCACAAAATTCAAGAACCTTATCAGTATTAAATTCTTAAAAATCTTTAACAATTTAATACAGTTTTGTACTCAACAGCCATATTAATATTTCATATACCATTAATTACACTAAGTACATAATGATTTATATGCATCAGTACTCCATACGGGTATAGTACATAACATTAATGTATCAAGACATATTATGTATAATAGTACATTACACTATTTACCCCATGCTTATAAGCAAGTACATGACATTATTAATAGTACATAGTACATATTATTATTGATCGTACATAGCACATTATGTCAAATCCATTCTTGTCAACATGCGTATCCCGTCCATTAGATCACGAGCTTAATTACCATGCCGCGTGAAACCAACAACCCGCTTGGCAAGGATCCCTCTTCTCGCT…
60-65	1459	AGCCCCACTATCAACACCCAAAGCTGAAGTTCTATTTAAACTATTCCCTGGCGCATATTAATATAGTTACACAAAATTCAAGAACCTTATCAGTATTAAATTCTTAAAAATCTTTAACAATTTAATACAGTTTTGTACTCAACAGCCATATTAATATTTCATATACCATTAATTACACTAAGTACATAATGATTTATATGCATCAGTACTCCATACGGGTATAGTACATAACATTAATGTATCAAGACATATTATGTATAATAGTACATTACACTATTTACCCCATGCTTATAAGCAAGTACATGACATTATTAATAGTACATAGTACATATTATTATTGATCGTACATAGCACATTATGTCAAATCCATTCTTGTCAACATGCGTATCCCGTCCATTA…
60-65	1462	AGCCCCACTATCAACACCCAAAGCTGAAGTTCTATTTAAACTATTCCCTGGCGCATATTAATATAGTTCCACAAAATTCAAGAACCTTATCAGTATTAAATTCTTAAAAATCTTTAACAATTTAATACAGTTTTGTACTCAACAGCCATATTAATATTTCATATACCATTAATTACACTAAGTACATAATGATTTATATGCATCAGTACTCCATACGGGTATAGTACATAACATTAATGTATCAAGACATATTATGTATAATAGTACATTACACTATTTACCCCATGCTTATAAGCAAGTACATGACATTATTAATAGTACATAGTACATATTATTATTGATCGTACATAGCACATTATGTCAAATCCATTCTTGTCAACATGCGTATCCCGTCCATTA…
60-65	1471	AGCCCCACTATCAACACCCAAAGCTGAAGTTCTATTTAAACTATTCCCTGGCGCATATTAATATAGTTCCACAAAATTCAAGAACCTTATCAGTATTAAATTCTTAAAAATCTTTAACAATTTAATACAGTTTTGTACTCAACAGCCATATTAATATTTCATATACCATTAATTACACTAAGTACATAATGATTTATATGCATCAGTACTCCATACGGGTATAGTACATAACATTAATGTATCAAGACATATTATGTATAATAGTACATTACACTATTTACCCCATGCTTATAAGCAAGTACATGACATTATTAATAGTACATAGTACATATTATTATTGATCGTACATAGCACATTATGTCAAATCCATTCTTGTCAACATGCGTATCCCGTCCATTA…
60-65	1474	AGCCCCACTATCAACACCCAAAGCTGAAGTTCTATTTAAACTATTCCCTGGCGCATATTAATATAGTTACACAAAATTCAAGAACCTTATCAGTATTAAATTCTTAAAAATCTTTAACAATTTAATACAGTTTTGTACTCAACAGCCATATTAATATTTCATATACCATTAATTACACTAAGTACATAATGATTTATATGCATCAGTACTCCATACGGGTATAGTACATAACATTAATGTATCAAGACATATTATGTATAATAGTACATTACACTATTTACCCCATGCTTATAAGCAAGTACATGACATTATTAATAGTACATAGTACATATTATTATTGATCGTACATAGCACATTATGTCAAATCCATTCTTGTCAACATGCGTATCCCGTCCATTA…
70-75	1548	CATGGGCCCGGAGCGAGAAGAGGGATCCTTGCCAAGCGGGTTGTTGGTTTCACGCGGCATGGTAATTAAGCTCGTGATCTAATGGACGGGATACGCATGTTGACAAGAATGGATTTGACATAATGTGCTATGTACGATCAATAATAATATGTACTATGTACTATTAATAATGTCATGTACTTGCTTATAAGCATGGGGTAAATAGTGTAATGTACTATTATACATAATATGTCTTGATACATTAATGTTATGTACTATACCCGTATGGAGTACTGATGCATATAAATCATTATGTACTTAGTGTAATTAATGGTATATGAAATATTAATATGGCTGTTGAGTACAAAACTGTATTAAATTGTTAAAGATTTTTAAGAATTTAATACTGATAAGGTTCTT…
70-75	1850	AGCCCCACTATCAACACCCAAAGCTGAAGTTCTATTTAAACTATTCCCTGGCGCATATTAATATAGTTCCACAAAATTCAAGAACCTTATCAGTATTAAATTCTTAAAAATCTTTAACAATTTAATACAGTTTTGTACTCAACAGCCATATTAATATTTCATATACCATTAATTACACTAAGTACATAATGATTTATATGCATCAGTACTCCATACGGGTATAGTACATAACATTAATGTATCAAGACATATTATGTATAATAGTACATTACACTATTTACCCCATGCTTATAAGCAAGTACATGACATTATTAATAGTACATAGTACATATTATTATTGATCGTACATAGCACATTATGTCAAATCCATTCTTGTCAACATGCGTATCCCGTCCATTA…
70-75	1933	AGCCCCACTATCAACACCCAAAGCTGAAGTTCTATTTAAACTATTCCCTGGCGCATATTAATATAGTTCCACAAAATTCAAGAACCTTATCAGTATTAAATTCTTAAAAATCTTTAACAATTTAATACAGTTTTGTACTCAACAGCCATATTAATATTTCATATACCATTAATTACACTAAGTACATAATGATTTATATGCATCAGTACTCCATACGGGTATAGTACATAACATTAATGTATCAAGACATATTATGTATAATAGTACATTACACTATTTACCCCATGCTTATAAGCAAGTACATGACATTATTAATAGTACATAGTACATATTATTATTGATCGTACATAGCACATTATGTCAAATCCATTCTTGTCAACATGCGTATCCCGTCCATTA…
70-75	1971	GCATGGGCCCGGAGCGAGAAGAGGGATCCTTGCCAAGCGGGTTGTTGGTTTCACGCGGCATGGTAATTAAGCTCGTGATCTAATGGACGGGATACGCATGTTGACAAGAATGGATTTGACATAATGTGCTATGTACGATCAATAATAATATGTACTATGTACTATTAATAATGTCATGTACTTGCTTATAAGCATGGGGTAAATAGTGTAATGTACTATTATACATAATATGTCTTGATACATTAATGTTATGTACTATACCCGTATGGAGTACTGATGCATATAAATCATTATGTACTTAGTGTAATTAATGGTATATGAAATATTAATATGGCTGTTGAGTACAAAACTGTATTAAATTGTTAAAGATTTTTAAGAATTTAATACTGATAAGGTTCT…
70-75	2020	AGCCCCACTATCAACACCCAAAGCTGAAGTTCTATTTAAACTATTCCCTGGCGCATATTAATATAGTTCCACAAAATTCAAGAACCTTATCAGTATTAAATTCTTAAAAATCTTTAACAATTTAATACAGTTTTGTACTCAACAGCCATATTAATATTTCATATACCATTAATTACACTAAGTACATAATGATTTATATGCATCAGTACTCCATACGGGTATAGTACATAACATTAATGTATCAAGACATATTATGTATAATAGTACATTACACTATTTACCCCATGCTTATAAGCAAGTACATGACATTATTAATAGTACATAGTACATATTATTATTGATCGTACATAGCACATTATGTCAAATCCATTCTTGTCAACATGCGTATCCCGTCCATTA…
70-75	2103	CATGGGCCCGGAGCGAGAAGAGGGATCCTTGCCAAGCGGGTTGTTGGTTTCACGCGGCATGGTAATTAAGCTCGTGATCTAATGGACGGGATACGCATGTTGACAAGAATGGATTTGACATAATGTGCTATGTACGATCAATAATAATATGTACTATGTACTATTAATAATGTCATGTACTTGCTTATAAGCATGGGGTAAATAGTGTAATGTACTATTATACATAATATGTCTTGATACATTAATGTTATGTACTATACCCGTATGGAGTACTGATGCATATAAATCATTATGTACTTAGTGTAATTAATGGTATATGAAATATTAATATGGCTGTTGAGTACAAAACTGTATTAAATTGTTAAAGATTTTTAAGAATTTAATACTGATAAGGTTCTT…
70-75	2165	CCCACAGTGCATGGGCCCGGAGCGAGAAGAGGGATCCTTGCCAAGCGGGTTGTTGGTTTCACGCGGCATGGTAATTAAGCTCGTGATCTAATGGACGGGATACGCATGTTGACAAGAATGGATTTGACATAATGTGCTATGTACGATCAATAATAATATGTACTATGTACTATTAATAATGTCATGTACTTGCTTATAAGCATGGGGTAAATAGTGTAATGTACTATTATACATAATATGTCTTGATACATTAATGTTATGTACTATACCCGTATGGAGTACTGATGCATATAAATCATTATGTACTTAGTGTAATTAATGGTATATGAAATATTAATATGGCTGTTGAGTACAAAACTGTATTAAATTGTTAAAGATTTTTAAGAATTTAATACTGAT…
70-75	1110	AGCCCCACTATCAACACCCAAAGCTGAAGTTCTATTTAAACTATTCCCTGGCGCATATTAATATAGTTCCACAAAATTCAAGAACCTTATCAGTATTAAATTCTTAAAAATCTTTAACAATTTAATACAGTTTTGTACTCAACAGCCATATTAATATTTCATATACCATTAATTACACTAAGTACATAATGATTTATATGCATCAGTACTCCATACGGGTATAGTACATAACATTAATGTATCAAGACATATTATGTATAATAGTACATTACACTATTTACCCCATGCTTATAAGCAAGTACATGACATTATTAATAGTACATAGTACATATTATTATTGATCGTACATAGCACATTATGTCAAATCCATTCTTGTCAACATGCGTATCCCGTCCATTA…
70-75	1270	AGCCCCACTATCAACACCCAAAGCTGAAGTTCTATTTAAACTATTCCCTGGCGCATATTAATATAGTTCCACAAAATTCAAGAACCTTATCAGTATTAAATTCTTAAAAATCTTTAACAATTTAATACAGTTTTGTACTCAACAGCCATATTAATATTTCATATACCATTAATTACACTAAGTACATAATGATTTATATGCATCAGTACTCCATACGGGTATAGTACATAACATTAATGTATCAAGACATATTATGTATAATAGTACATTACACTATTTACCCCATGCTTATAAGCAAGTACATGACATTATTAATAGTACATAGTACATATTATTATTGATCGTACATAGCACATTATGTCAAATCCATTCTTGTCAACATGCGTATCCCGTCCATTA…
70-75	1500	AGCCCCACTATCAACACCCAAAGCTGAAGTTCTATTTAAACTATTCCCTGGCGCATATTAATATAGTTACACAAAATTCAAGAACCTTATCAGTATTAAATTCTTAAAAATCTTTAACAATTTAATACAGTTTTGTACTCAACAGCCATATTAATATTTCATATACCATTAATTACACTAAGTACATAATGATTTATATGCATCAGTACTCCATACGGGTATAGTACATAACATTAATGTATCAAGACATATTATGTATAATAGTACATTACACTATTTACCCCATGCTTATAAGCAAGTACATGACATTATTAATAGTACATAGTACATATTATTATTGATCGTACATAGCACATTATGTCAAATCCATTCTTGTCAACATGCGTATCCCGTCCATTA…
70-75	1543	AGCCCCACTATCAACACCCAAAGCTGAAGTTCTATTTAAACTATTCCCTGGCGCATATTAATATAGTTACACAAAATTCAAGAACCTTATCAGTATTAAATTCTTAAAAATCTTTAACAATTTAATACAGTTTTGTACTCAACAGCCATATTAATATTTCATATACCATTAATTACACTAAGTACATAATGATTTATATGCATCAGTACTCCATACGGGTATAGTACATAACATTAATGTATCAAGACATATTATGTATAATAGTACATTACACTATTTACCCCATGCTTATAAGCAAGTACATGACATTATTAATAGTACATAGTACATATTATTATTGATCGTACATAGCACATTATGTCAAATCCATTCTTGTCAACATGCGTATCCCGTCCATTA…
70-75	1574	AGCCCCACTATCAACACCCAAAGCTGAAGTTCTATTTAAACTATTCCCTGGCGCATATTAATATAGTTCCACAAAATTCAAGAACCTTATCAGTATTAAATTCTTAAAAATCTTTAACAATTTAATACAGTTTTGTACTCAACAGCCATATTAATATTTCATATACCATTAATTACACTAAGTACATAATGATTTATATGCATCAGTACTCCATACGGGTATAGTACATAACATTAATGTATCAAGACATATTATGTATAATAGTACATTACACTATTTACCCCATGCTTATAAGCAAGTACATGACATTATTAATAGTACATAGTACATATTATTATTGATCGTACATAGCACATTATGTCAAATCCATTCTTGTCAACATGCGTATCCCGTCCATTA…
70-75	1582	AGCCCCACTATCAACACCCAAAGCTGAAGTTCTATTTAAACTATTCCCTGGCGCATATTAATATAGTTCCACAAAATTCAAGAACCTTATCAGTATTAAATTCTTAAAAATCTTTAACAATTTAATACAGTTTTGTACTCAACAGCCATATTAATATTTCATATACCATTAATTACACTAAGTACATAATGATTTATATGCATCAGTACTCCATACGGGTATAGTACATAACATTAATGTATCAAGACATATTATGTATAATAGTACATTACACTATTTACCCCATGCTTATAAGCAAGTACATGACATTATTAATAGTACATAGTACATATTATTATTGATCGTACATAGCACATTATGTCAAATCCATTCTTGTCAACATGCGTATCCCGTCCATTA…
70-75	1602	AGCCCCACTATCAACACCCAAAGCTGAAGTTCTATTTAAACTATTCCCTGGCGCATATTAATATAGTTACACAAAATTCAAGAACCTTATCAGTATTAAATTCTTAAAAATCTTTAACAATTTAATACAGTTTTGTACTCAACAGCCATATTAATATTTCATATACCATTAATTACACTAAGTACATAATGATTTATATGCATCAGTACTCCATACGGGTATAGTACATAACATTAATGTATCAAGACATATTATGTATAATAGTACATTACACTATTTACCCCATGCTTATAAGCAAGTACATGACATTATTAATAGTACATAGTACATATTATTATTGATCGTACATAGCACATTATGTCAAATCCATTCTTGTCAACATGCGTATCCCGTCCATTA…
70-75	1622	AGCCCCACTATCAACACCCAAAGCTGAAGTTCTATTTAAACTATTCCCTGGCGCATATTAATATAGTTCCACAAAATTCAAGAACCTTATCAGTATTAAATTCTTAAAAATCTTTAACAATTTAATACAGTTTTGTACTCAACAGCCATATTAATATTTCATATACCATTAATTACACTAAGTACATAATGATTTATATGCATCAGTACTCCATACGGGTATAGTACATAACATTAATGTATCAAGACATATTATGTATAATAGTACATTACACTATTTACCCCATGCTTATAAGCAAGTACATGACATTATTAATAGTACATAGTACATATTATTATTGATCGTACATAGCACATTATGTCAAATCCATTCTTGTCAACATGCGTATCCCGTCCATTA…
70-75	1672	AGCCCCACTATCAACACCCAAAGCTGAAGTTCTATTTAAACTATTCCCTGGCGCATATTAATATAGTTCCACAAAATTCAAGAACCTTATCAGTATTAAATTCTTAAAAATCTTTAACAATTTAATACAGTTTTGTACTCAACAGCCATATTAATATTTCATATACCATTAATTACACTAAGTACATAATGATTTATATGCATCAGTACTCCATACGGGTATAGTACATAACATTAATGTATCAAGACATATTATGTATAATAGTACATTACACTATTTACCCCATGCTTATAAGCAAGTACATGACATTATTAATAGTACATAGTACATATTATTATTGATCGTACATAGCACATTATGTCAAATCCATTCTTGTCAACATGCGTATCCCGTCCATTA…
70-75	1681	AGCCCCACTATCAACACCCAAAGCTGAAGTTCTATTTAAACTATTCCCTGGCGCATATTAATATAGTTACACAAAATTCAAGAACCTTATCAGTATTAAATTCTTAAAAATCTTTAACAATTTAATACAGTTTTGTACTCAACAGCCATATTAATATTTCATATACCATTAATTACACTAAGTACATAATGATTTATATGCATCAGTACTCCATACGGGTATAGTACATAACATTAATGTATCAAGACATATTATGTATAATAGTACATTACACTATTTACCCCATGCTTATAAGCAAGTACATGACATTATTAATAGTACATAGTACATATTATTATTGATCGTACATAGCACATTATGTCAAATCCATTCTTGTCAACATGCGTATCCCGTCCATTA…
70-75	1691	AGCCCCACTATCAACACCCAAAGCTGAAGTTCTATTTAAACTATTCCCTGGCGCATATTAATATAGTTCCACAAAATTCAAGAACCTTATCAGTATTAAATTCTTAAAAATCTTTAACAATTTAATACAGTTTTGTACTCAACAGCCATATTAATATTTCATATACCATTAATTACACTAAGTACATAATGATTTATATGCATCAGTACTCCATACGGGTATAGTACATAACATTAATGTATCAAGACATATTATGTATAATAGTACATTACACTATTTACCCCATGCTTATAAGCAAGTACATGACATTATTAATAGTACATAGTACATATTATTATTGATCGTACATAGCACATTATGTCAAATCCATTCTTGTCAACATGCGTATCCCGTCCATTA…
70-75	1800	AGCCCCACTATCAACACCCAAAGCTGAAGTTCTATTTAAACTATTCCCTGGCGCATATTAATATAGTTCCACAAAATTCAAGAACCTTATCAGTATTAAATTCTTAAAAATCTTTAACAATTTAATACAGTTTTGTACTCAACAGCCATATTAATATTTCATATACCATTAATTACACTAAGTACATAATGATTTATATGCATCAGTACTCCATACGGGTATAGTACATAACATTAATGTATCAAGACATATTATGTATAATAGTACATTACACTATTTACCCCATGCTTATAAGCAAGTACATGACATTATTAATAGTACATAGTACATATTATTATTGATCGTACATAGCACATTATGTCAAATCCATTCTTGTCAACATGCGTATCCCGTCCATTA…
70-75	1825	AGCCCCACTATCAACACCCAAAGCTGAAGTTCTATTTAAACTATTCCCTGGCGCATATTAATATAGTTACACAAAATTCAAGAACCTTATCAGTATTAAATTCTTAAAAATCTTTAACAATTTAATACAGTTTTGTACTCAACAGCCATATTAATATTTCATATACCATTAATTACACTAAGTACATAATGATTTATATGCATCAGTACTCCATACGGGTATAGTACATAACATTAATGTATCAAGACATATTATGTATAATAGTACATTACACTATTTACCCCATGCTTATAAGCAAGTACATGACATTATTAATAGTACATAGTACATATTATTATTGATCGTACATAGCACATTATGTCAAATCCATTCTTGTCAACATGCGTATCCCGTCCATTA…
70-75	1922	AGCCCCACTATCAACACCCAAAGCTGAAGTTCTATTTAAACTATTCCCTGGCGCATATTAATATAGTTCCACAAAATTCAAGAACCTTATCAGTATTAAATTCTTAAAAATCTTTAACAATTTAATACAGTTTTGTACTCAACAGCCATATTAATATTTCATATACCATTAATTACACTAAGTACATAATGATTTATATGCATCAGTACTCCATACGGGTATAGTACATAACATTAATGTATCAAGACATATTATGTATAATAGTACATTACACTATTTACCCCATGCTTATAAGCAAGTACATGACATTATTAATAGTACATAGTACATATTATTATTGATCGTACATAGCACATTATGTCAAATCCATTCTTGTCAACATGCGTATCCCGTCCATTA…
70-75	1928	CCACAAAATTCAAGAACCTTATCAGTATTAAATTCTTAAAAATCTTTAACAATTTAATACAGTTTTGTACTCAACAGCCATATTAATATTTCATATACCATTAATTACACTAAGTACATAATGATTTATATGCATCAGTACTCCATACGGGTATAGTACATAACATTAATGTATCAAGACATATTATGTATAATAGTACATTACACTATTTACCCCATGCTTATAAGCAAGTACATGACATTATTAATAGTACATAGTACATATTATTATTGATCGTACATAGCACATTATGTCAAATCCATTCTTGTCAACATGCGTATCCCGTCCATTAGATCACGAGCTTAATTACCATGCCGCGTGAAACCAACAACCCGCTTGGCAAGGATCCCTCTTCTCGCT…
70-75	1964	CCACAAAATTCAAGAACCTTATCAGTATTAAATTCTTAAAAATCTTTAACAATTTAATACAGTTTTGTACTCAACAGCCATATTAATATTTCATATACCATTAATTACACTAAGTACATAATGATTTATATGCATCAGTACTCCATACGGGTATAGTACATAACATTAATGTATCAAGACATATTATGTATAATAGTACATTACACTATTTACCCCATGCTTATAAGCAAGTACATGACATTATTAATAGTACATAGTACATATTATTATTGATCGTACATAGCACATTATGTCAAATCCATTCTTGTCAACATGCGTATCCCGTCCATTAGATCACGAGCTTAATTACCATGCCGCGTGAAACCAACAACCCGCTTGGCAAGGATCCCTCTTCTCGCT…
70-75	1971	AGCCCCACTATCAACACCCAAAGCTGAAGTTCTATTTAAACTATTCCCTGGCGCATATTAATATAGTTACACAAAATTCAAGAACCTTATCAGTATTAAATTCTTAAAAATCTTTAACAATTTAATACAGTTTTGTACTCAACAGCCATATTAATATTTCATATACCATTAATTACACTAAGTACATAATGATTTATATGCATCAGTACTCCATACGGGTATAGTACATAACATTAATGTATCAAGACATATTATGTATAATAGTACATTACACTATTTACCCCATGCTTATAAGCAAGTACATGACATTATTAATAGTACATAGTACATATTATTATTGATCGTACATAGCACATTATGTCAAATCCATTCTTGTCAACATGCGTATCCCGTCCATTA…
70-75	2085	AGCCCCACTATCAACACCCAAAGCTGAAGTTCTATTTAAACTATTCCCTGGCGCATATTAATATAGTTCCACAAAATTCAAGAACCTTATCAGTATTAAATTCTTAAAAATCTTTAACAATTTAATACAGTTTTGTACTCAACAGCCATATTAATATTTCATATACCATTAATTACACTAAGTACATAATGATTTATATGCATCAGTACTCCATACGGGTATAGTACATAACATTAATGTATCAAGACATATTATGTATAATAGTACATTACACTATTTACCCCATGCTTATAAGCAAGTACATGACATTATTAATAGTACATAGTACATATTATTATTGATCGTACATAGCACATTATGTCAAATCCATTCTTGTCAACATGCGTATCCCGTCCATTA…
70-75	2092	AGCCCCACTATCAACACCCAAAGCTGAAGTTCTATTTAAACTATTCCCTGGCGCATATTAATATAGTTACACAAAATTCAAGAACCTTATCAGTATTAAATTCTTAAAAATCTTTAACAATTTAATACAGTTTTGTACTCAACAGCCATATTAATATTTCATATACCATTAATTACACTAAGTACATAATGATTTATATGCATCAGTACTCCATACGGGTATAGTACATAACATTAATGTATCAAGACATATTATGTATAATAGTACATTACACTATTTACCCCATGCTTATAAGCAAGTACATGACATTATTAATAGTACATAGTACATATTATTATTGATCGTACATAGCACATTATGTCAAATCCATTCTTGTCAACATGCGTATCCCGTCCATTA…
80-85	1848	AGCCCCACTATCAACACCCAAAGCTGAAGTTCTATTTAAACTATTCCCTGGCGCATATTAATATAGTTCCACAAAATTCAAGAACCTTATCAGTATTAAATTCTTAAAAATCTTTAACAATTTAATACAGTTTTGTACTCAACAGCCATATTAATATTTCATATACCATTAATTACACTAAGTACATAATGATTTATATGCATCAGTACTCCATACGGGTATAGTACATAACATTAATGTATCAAGACATATTATGTATAATAGTACATTACACTATTTACCCCATGCTTATAAGCAAGTACATGACATTATTAATAGTACATAGTACATATTATTATTGATCGTACATAGCACATTATGTCAAATCCATTCTTGTCAACATGCGTATCCCGTCCATTA…
80-85	2102	GTTCCACAAAATTCAAGAACCTTATCAGTATTAAATTCTTAAAAATCTTTAACAATTTAATACAGTTTTGTACTCAACAGCCATATTAATATTTCATATACCATTAATTACACTAAGTACATAATGATTTATATGCATCAGTACTCCATACGGGTATAGTACATAACATTAATGTATCAAGACATATTATGTATAATAGTACATTACACTATTTACCCCATGCTTATAAGCAAGTACATGACATTATTAATAGTACATAGTACATATTATTATTGATCGTACATAGCACATTATGTCAAATCCATTCTTGTCAACATGCGTATCCCGTCCATTAGATCACGAGCTTAATTACCATGCCGCGTGAAACCAACAACCCGCTTGGCAAGGATCCCTCTTCTC…
80-85	2716	AGCCCCACTATCAACACCCAAAGCTGAAGTTCTATTTAAACTATTCCCTGGCGCATATTAATATAGTTCCACCAAATTCAAGAACCTTATCAGTATTAAATTCTTAAAAATCTTTAACAATTTAATACAGGTTTGTACTCCACAGCCATATTAATATTTCATATACCATTAATTACACTAAGTACATAATGATTTATATGCATCAGTACTCCATACGGGTATAGTACATAACATTAATGTATCAAGACATATTATGTATAATAGTACATTACACTATTTACCCCATGCTTATAAGCAAGTACATGACATTATTAATAGTACATAGTACATATTATTATTGATCGTACATAGCACATTATGTCAAATCCATTCTTGTCAACATGCGTATCCCGTCCATTA…
80-85	2783	CAGGACTCCCTACGGGGATAGTACATAACATTAATGGAGCAAGACATATTATGTATAAGAGGACATTACACTATTTACCCCATGCGTATAAGCAAGGACCTGAGGTTATTATTAGTACATAGTGCATATTATTATTGAGCGTGCATAGCACATTATGTCAAATCCATTCTTGTCAACATGCGTATCCCGTCCATTAGATCACGAGCTTAATTACCATGCCGCGGGAGGCCAACAACCCGCTTGGGAGGGATGCCTCTTCTCGCTCCGGGCCCATGCACTGTGGGGGGAGCTATTTCAT
80-85	2788	AGCCCCACTATCAACACCCAAAGCTGAAGTTCTATTTAAACTATTCCCTGGCGCATATTAATATAGTTCCACAAAATTCAAGAACCTTATCAGTATTAAATTCTTAAAAATCTTTAACAATTTAATACAGTTTTGTACTCAACAGCCATATTAATATTTCATATACCATTAATTACACTAAGTACATAATGATTTATATGCATCAGTACTCCATACGGGTATAGTACATAACATTAATGTATCAAGACATATTATGTATAATAGTACATTACACTATTTACCCCATGCTTATAAGCAAGTACATGACATTATTAATAGTACATAGTACATATTATTATTGATCGTACATAGCACATTATGTCAAATCCATTCTTGTCAACATGCGTATCCCGTCCATTA…
80-85	2791	ACAAAATTCAAGAACCTTATCAGTATTAAATTCTTAAAAATCTTTAACAATTTAATACAGTTTTGTACTCAACAGCCATATTAATATTTCATATACCATTAATTACACTAAGTACATAATGATTTATATGCATCAGTACTCCATACGGGTATAGTACATAACATTAATGTATCAAGACATATTATGTATAATAGTACATTACACTATTTACCCCATGCTTATAAGCAAGTACATGACATTATTAATAGTACATAGTACATATTATTATTGATCGTACATAGCACATTATGTCAAATCCATTCTTGTCAACATGCGTATCCCGTCCATTAGATCACGAGCTTAATTACCATGCCGCGTGAAACCAACAACCCGCTTGGGAAGGATCCCTCTTCTCGCTCC…
80-85	2806	AGCCCCACTATCAACACCCAAAGCTGAAGTTCTATTTAAACTATTCCCTGGCGCATATTAATATAGTTCCACAAAATTCAAGAACCTTATCAGTATTAAATTCTTAAAAATCTTTAACAATTTAATACAGTTTTGTACTCAACAGCCATATTAATATTTCATATACCATTAATTACACTAAGTACATAATGATTTATATGCATCAGTACTCCATACGGGTATAGTACATAACATTAATGTATCAAGACATATTATGTATAATAGTACATTACACTATTTACCCCATGCTTATAAGCAAGTACATGACATTATTAATAGTACATAGTACATATTATTATTGATCGTACATAGCACATTATGTCAAATCCATTCTTGTCAACATGCGTATCCCGTCCATTA…
80-85	2829	AGCCCCACTATCAACACCCAAAGCTGAAGTTCTATTTAAACTATTCCCTGGCGCATATTAATATAGTTCCACAAAATTCAAGAACCTTATCAGTATTAAATTCTTAAAAATCTTTAACAATTTAATACAGTTTTGTACTCAACAGCCATATTAATATTTCATATACCATTAATTACACTAAGTACATAATGATTTATATGCATCAGTACTCCATACGGGTATAGTACATAACATTAATGTATCAAGACATATTATGTATAATAGTACATTACACTATTTACCCCATGCTTATAAGCAAGTACATGACATTATTAATAGTACATAGTACATATTATTATTGATCGTACATAGCACATTATGTCAAATCCATTCTTGTCAACATGCGTATCCCGTCCATTA…
80-85	2847	AGCCCCACTATCAACACCCAAAGCTGAAGTTCTATTTAAACTATTCCCTGGCGCATATTAATATAGTTACACAAAATTCAAGAACCTTATCAGTATTAAATTCTTAAAAATCTTTAACAATTTAATACAGTTTTGTACTCAACAGCCATATTAATATTTCATATACCATTAATTACACTAAGTACATAATGATTTATATGCATCAGTACTCCATACGGGTATAGTACATAACATTAATGTATCAAGACATATTATGTATAATAGTACATTACACTATTTACCCCATGCTTATAAGCAAGTACATGACATTATTAATAGTACATAGTACATATTATTATTGATCGTACATAGCACATTATGTCAAATCCATTCTTGTCAACATGCGTATCCCGTCCATTA…
80-85	2829A	TGCATGGGCCCGGAGCGAGAAGAGGGATCCTTGCCAAGCGGGTTGTTGGTTTCACGCGGCATGGTAATTAAGCTCGTGATCTAATGGACGGGATACGCATGTTGACAAGAATGGATTTGACATAATGTGCTATGTACGATCAATAATAATATGTACTATGTACTATTAATAATGTCATGTACTTGCTTATAAGCATGGGGTAAATAGTGTAATGTACTATTATACATAATATGTCTTGATACATTAATGTTATGTACTATACCCGTATGGAGTACTGATGCATATAAATCATTATGTACTTAGTGTAATTAATGGTATATGAAATATTAATATGGCTGTTGAGTACAAAACTGTATTAAATTGTTAAAGATTTTTAAGAATTTAATACTGATAAGGTTC…
80-85	1673	AGCCCCACTATCAACACCCAAAGCTGAAGTTCTATTTAAACTATTCCCTGGCGCATATTAATATAGTTCCACAAAATTCAAGAACCTTATCAGTATTAAATTCTTAAAAATCTTTAACAATTTAATACAGTTTTGTACTCAACAGCCATATTAATATTTCATATACCATTAATTACACTAAGTACATAATGATTTATATGCATCAGTACTCCATACGGGTATAGTACATAACATTAATGTATCAAGACATATTATGTATAATAGTACATTACACTATTTACCCCATGCTTATAAGCAAGTACATGACATTATTAATAGTACATAGTACATATTATTATTGATCGTACATAGCACATTATGTCAAATCCATTCTTGTCAACATGCGTATCCCGTCCATTA…
80-85	1813	AGCCCCACTATCAACACCCAAAGCTGAAGTTCTATTTAAACTATTCCCTGGCGCATATTAATATAGTTACACAAAATTCAAGAACCTTATCAGTATTAAATTCTTAAAAATCTTTAACAATTTAATACAGTTTTGTACTCAACAGCCATATTAATATTTCATATACCATTAATTACACTAAGTACATAATGATTTATATGCATCAGTACTCCATACGGGTATAGTACATAACATTAATGTATCAAGACATATTATGTATAATAGTACATTACACTATTTACCCCATGCTTATAAGCAAGTACATGACATTATTAATAGTACATAGTACATATTATTATTGATCGTACATAGCACATTATGTCAAATCCATTCTTGTCAACATGCGTATCCCGTCCATTA…
80-85	1980	CCACAAAATTCAAGAACCTTATCAGTATTAAATTCTTAAAAATCTTTAACAATTTAATACAGTTTTGTACTCAACAGCCATATTAATATTTCATATACCATTAATTACACTAAGTACATAATGATTTATATGCATCAGTACTCCATACGGGTATAGTACATAACATTAATGTATCAAGACATATTATGTATAATAGTACATTACACTATTTACCCCATGCTTATAAGCAAGTACATGACATTATTAATAGTACATAGTACATATTATTATTGATCGTACATAGCACATTATGTCAAATCCATTCTTGTCAACATGCGTATCCCGTCCATTAGATCACGAGCTTAATTACCATGCCGCGTGAAACCAACAACCCGCTTGGCAAGGATCCCTCTTCTCGCT…
80-85	1988	AGCCCCACTATCAACACCCAAAGCTGAAGTTCTATTTAAACTATTCCCTGGCGCATATTAATATAGTTACACAAAATTCAAGAACCTTATCAGTATTAAATTCTTAAAAATCTTTAACAATTTAATACAGTTTTGTACTCAACAGCCATATTAATATTTCATATACCATTAATTACACTAAGTACATAATGATTTATATGCATCAGTACTCCATACGGGTATAGTACATAACATTAATGTATCAAGACATATTATGTATAATAGTACATTACACTATTTACCCCATGCTTATAAGCAAGTACATGACATTATTAATAGTACATAGTACATATTATTATTGATCGTACATAGCACATTATGTCAAATCCATTCTTGTCAACATGCGTATCCCGTCCATTA…
80-85	2040	AGCCCCACTATCAACACCCAAAGCTGAAGTTCTATTTAAACTATTCCCTGGCGCATATTAATATAGTTCCACAAAATTCAAGAACCTTATCAGTATTAAATTCTTAAAAATCTTTAACAATTTAATACAGTTTTGTACTCAACAGCCATATTAATATTTCATATACCATTAATTACACTAAGTACATAATGATTTATATGCATCAGTACTCCATACGGGTATAGTACATAACATTAATGTATCAAGACATATTATGTATAATAGTACATTACACTATTTACCCCATGCTTATAAGCAAGTACATGACATTATTAATAGTACATAGTACATATTATTATTGATCGTACATAGCACATTATGTCAAATCCATTCTTGTCAACATGCGTATCCCGTCCATTA…
80-85	2044	AGCCCCACTATCAACACCCAAAGCTGAAGTTCTATTTAAACTATTCCCTGGCGCATATTAATATAGTTCCACAAAATTCAAGAACCTTATCAGTATTAAATTCTTAAAAATCTTTAACAATTTAATACAGTTTTGTACTCAACAGCCATATTAATATTTCATATACCATTAATTACACTAAGTACATAATGATTTATATGCATCAGTACTCCATACGGGTATAGTACATAACATTAATGTATCAAGACATATTATGTATAATAGTACATTACACTATTTACCCCATGCTTATAAGCAAGTACATGACATTATTAATAGTACATAGTACATATTATTATTGATCGTACATAGCACATTATGTCAAATCCATTCTTGTCAACATGCGTATCCCGTCCATTA…
80-85	2295	AGCCCCACTATCAACACCCAAAGCTGAAGTTCTATTTAAACTATTCCCTGGCGCATATTAATATAGTTCCACAAAATTCAAGAACCTTATCAGTATTAAATTCTTAAAAATCTTTAACAATTTAATACAGTTTTGTACTCAACAGCCATATTAATATTTCATATACCATTAATTACACTAAGTACATAATGATTTATATGCATCAGTACTCCATACGGGTATAGTACATAACATTAATGTATCAAGACATATTATGTATAATAGTACATTACACTATTTACCCCATGCTTATAAGCAAGTACATGACATTATTAATAGTACATAGTACATATTATTATTGATCGTACATAGCACATTATGTCAAATCCATTCTTGTCAACATGCGTATCCCGTCCATTA…
80-85	2716	AGCCCCACTATCAACACCCAAAGCTGAAGTTCTATTTAAACTATTCCCTGGCGCATATTAATATAGTTACACAAAATTCAAGAACCTTATCAGTATTAAATTCTTAAAAATCTTTAACAATTTAATACAGTTTTGTACTCAACAGCCATATTAATATTTCATATACCATTAATTACACTAAGTACATAATGATTTATATGCATCAGTACTCCATACGGGTATAGTACATAACATTAATGTATCAAGACATATTATGTATAATAGTACATTACACTATTTACCCCATGCTTATAAGCAAGTACATGACATTATTAATAGTACATAGTACATATTATTATTGATCGTACATAGCACATTATGTCAAATCCATTCTTGTCAACATGCGTATCCCGTCCATTA…
80-85	2728	AGCCCCACTATCAACACCCAAAGCTGAAGTTCTATTTAAACTATTCCCTGGCGCATATTAATATAGTTCCACAAAATTCAAGAACCTTATCAGTATTAAATTCTTAAAAATCTTTAACAATTTAATACAGTTTTGTACTCAACAGCCATATTAATATTTCATATACCATTAATTACACTAAGTACATAATGATTTATATGCATCAGTACTCCATACGGGTATAGTACATAACATTAATGTATCAAGACATATTATGTATAATAGTACATTACACTATTTACCCCATGCTTATAAGCAAGTACATGACATTATTAATAGTACATAGTACATATTATTATTGATCGTACATAGCACATTATGTCAAATCCATTCTTGTCAACATGCGTATCCCGTCCATTA…
80-85	2741	AGCCCCACTATCAACACCCAAAGCTGAAGTTCTATTTAAACTATTCCCTGGCGCATATTAATATAGTTCCACAAAATTCAAGAACCTTATCAGTATTAAATTCTTAAAAATCTTTAACAATTTAATACAGTTTTGTACTCAACAGCCATATTAATATTTCATATACCATTAATTACACTAAGTACATAATGATTTATATGCATCAGTACTCCATACGGGTATAGTACATAACATTAATGTATCAAGACATATTATGTATAATAGTACATTACACTATTTACCCCATGCTTATAAGCAAGTACATGACATTATTAATAGTACATAGTACATATTATTATTGATCGTACATAGCACATTATGTCAAATCCATTCTTGTCAACATGCGTATCCCGTCCATTA…
80-85	2763	AGCCCCACTATCAACACCCAAAGCTGAAGTTCTATTTAAACTATTCCCTGGCGCATATTAATATAGTTACACAAAATTCAAGAACCTTATCAGTATTAAATTCTTAAAAATCTTTAACAATTTAATACAGTTTTGTACTCAACAGCCATATTAATATTTCATATACCATTAATTACACTAAGTACATAATGATTTATATGCATCAGTACTCCATACGGGTATAGTACATAACATTAATGTATCAAGACATATTATGTATAATAGTACATTACACTATTTACCCCATGCTTATAAGCAAGTACATGACATTATTAATAGTACATAGTACATATTATTATTGATCGTACATAGCACATTATGTCAAATCCATTCTTGTCAACATGCGTATCCCGTCCATTA…
80-85	2783	AGCCCCACTATCAACACCCAAAGCTGAAGTTCTATTTAAACTATTCCCTGGCGCATATTAATATAGTTCCACAAAATTCAAGAACCTTATCAGTATTAAATTCTTAAAAATCTTTAACAATTTAATACAGTTTTGTACTCAACAGCCATATTAATATTTCATATACCATTAATTACACTAAGTACATAATGATTTATATGCATCAGTACTCCATACGGGTATAGTACATAACATTAATGTATCAAGACATATTATGTATAATAGTACATTACACTATTTACCCCATGCTTATAAGCAAGTACATGACATTATTAATAGTACATAGTACATATTATTATTGATCGTACATAGCACATTATGTCAAATCCATTCTTGTCAACATGCGTATCCCGTCCATTA…
80-85	2788	AGCCCCACTATCAACACCCAAAGCTGAAGTTCTATTTAAACTATTCCCTGGCGCATATTAATATAGTTCCACAAAATTCAAGAACCTTATCAGTATTAAATTCTTAAAAATCTTTAACAATTTAATACAGTTTTGTACTCAACAGCCATATTAATATTTCATATACCATTAATTACACTAAGTACATAATGATTTATATGCATCAGTACTCCATACGGGTATAGTACATAACATTAATGTATCAAGACATATTATGTATAATAGTACATTACACTATTTACCCCATGCTTATAAGCAAGTACATGACATTATTAATAGTACATAGTACATATTATTATTGATCGTACATAGCACATTATGTCAAATCCATTCTTGTCAACATGCGTATCCCGTCCATTA…
80-85	2800	AGCCCCACTATCAACACCCAAAGCTGAAGTTCTATTTAAACTATTCCCTGGCGCATATTAATATAGTTCCACAAAATTCAAGAACCTTATCAGTATTAAATTCTTAAAAATCTTTAACAATTTAATACAGTTTTGTACTCAACAGCCATATTAATATTTCATATACCATTAATTACACTAAGTACATAATGATTTATATGCATCAGTACTCCATACGGGTATAGTACATAACATTAATGTATCAAGACATATTATGTATAATAGTACATTACACTATTTACCCCATGCTTATAAGCAAGTACATGACATTATTAATAGTACATAGTACATATTATTATTGATCGTACATAGCACATTATGTCAAATCCATTCTTGTCAACATGCGTATCCCGTCCATTA…
80-85	2830	AGCCCCACTATCAACACCCAAAGCTGAAGTTCTATTTAAACTATTCCCTGGCGCATATTAATATAGTTACACAAAATTCAAGAACCTTATCAGTATTAAATTCTTAAAAATCTTTAACAATTTAATACAGTTTTGTACTCAACAGCCATATTAATATTTCATATACCATTAATTACACTAAGTACATAATGATTTATATGCATCAGTACTCCATACGGGTATAGTACATAACATTAATGTATCAAGACATATTATGTATAATAGTACATTACACTATTTACCCCATGCTTATAAGCAAGTACATGACATTATTAATAGTACATAGTACATATTATTATTGATCGTACATAGCACATTATGTCAAATCCATTCTTGTCAACATGCGTATCCCGTCCATTA…
80-85	2831	AGCCCCACTATCAACACCCAAAGCTGAAGTTCTATTTAAACTATTCCCTGGCGCATATTAATATAGTTCCACAAAATTCAAGAACCTTATCAGTATTAAATTCTTAAAAATCTTTAACAATTTAATACAGTTTTGTACTCAACAGCCATATTAATATTTCATATACCATTAATTACACTAAGTACATAATGATTTATATGCATCAGTACTCCATACGGGTATAGTACATAACATTAATGTATCAAGACATATTATGTATAATAGTACATTACACTATTTACCCCATGCTTATAAGCAAGTACATGACATTATTAATAGTACATAGTACATATTATTATTGATCGTACATAGCACATTATGTCAAATCCATTCTTGTCAACATGCGTATCCCGTCCATTA…
80-85	2832	AGCCCCACTATCAACACCCAAAGCTGAAGTTCTATTTAAACTATTCCCTGGCGCATATTAATATAGTTCCACAAAATTCAAGAACCTTATCAGTATTAAATTCTTAAAAATCTTTAACAATTTAATACAGTTTTGTACTCAACAGCCATATTAATATTTCATATACCATTAATTACACTAAGTACATAATGATTTATATGCATCAGTACTCCATACGGGTATAGTACATAACATTAATGTATCAAGACATATTATGTATAATAGTACATTACACTATTTACCCCATGCTTATAAGCAAGTACATGACATTATTAATAGTACATAGTACATATTATTATTGATCGTACATAGCACATTATGTCAAATCCATTCTTGTCAACATGCGTATCCCGTCCATTA…
80-85	2840	AGCCCCACTATCAACACCCAAAGCTGAAGTTCTATTTAAACTATTCCCTGGCGCATATTAATATAGTTACACAAAATTCAAGAACCTTATCAGTATTAAATTCTTAAAAATCTTTAACAATTTAATACAGTTTTGTACTCAACAGCCATATTAATATTTCATATACCATTAATTACACTAAGTACATAATGATTTATATGCATCAGTACTCCATACGGGTATAGTACATAACATTAATGTATCAAGACATATTATGTATAATAGTACATTACACTATTTACCCCATGCTTATAAGCAAGTACATGACATTATTAATAGTACATAGTACATATTATTATTGATCGTACATAGCACATTATGTCAAATCCATTCTTGTCAACATGCGTATCCCGTCCATTA…
80-85	2843	AGCCCCACTATCAACACCCAAAGCTGAAGTTCTATTTAAACTATTCCCTGGCGCATATTAATATAGTTCCACAAAATTCAAGAACCTTATCAGTATTAAATTCTTAAAAATCTTTAACAATTTAATACAGTTTTGTACTCAACAGCCATATTAATATTTCATATACCATTAATTACACTAAGTACATAATGATTTATATGCATCAGTACTCCATACGGGTATAGTACATAACATTAATGTATCAAGACATATTATGTATAATAGTACATTACACTATTTACCCCATGCTTATAAGCAAGTACATGACATTATTAATAGTACATAGTACATATTATTATTGATCGTACATAGCACATTATGTCAAATCCATTCTTGTCAACATGCGTATCCCGTCCATTA…
90-95	2699	AGCCCCACTATCAACACCCAAAGCTGAAGTTCTATTTAAACTATTCCCTGGCGCATATTAATATAGTTCCACAAAATTCAAGAACCTTATCAGTATTAAATTCTTAAAAATCTTTAACAATTTAATACAGTTTTGTACTCAACAGCCATATTAATATTTCATATACCATTAATTACACTAAGTACATAATGATTTATATGCATCAGTACTCCATACGGGTATAGTACATAACATTAATGTATCAAGACATATTATGTATAATAGTACATTACACTATTTACCCCATGCTTATAAGCAAGTACATGACATTATTAATAGTACATAGTACATATTATTATTGATCGTACATAGCACATTATGTCAAATCCATTCTTGTCAACATGCGTATCCCGTCCATTA…
90-95	2706	CAGGAGAGCTATAGCCCCACTATCAACACCCAAAGCTGAAGTTCTATTTAAACTATTCCCTGGCGCATATTAATATAGTTCCACAAAATTCAAGAACCTTATCAGTATTAAATTCTTAAAAATCTTTAACAATTTAATACAGTTTTGTACTCAACAGCCATATTAATATTTCATATACCATTAATTACACTAAGTACATAATGATTTATATGCATCAGTACTCCATACGGGTATAGTACATAACATTAATGTATCAAGACATATTATGTATAATAGTACATTACACTATTTACCCCATGCTTATAAGCAAGTACATGACATTATTAATAGTACATAGTACATATTATTATTGATCGTACATAGCACATTATGTCAAATCCATTCTTGTCAACATGCGTA…
90-95	2722	AGCCCCACTATCAACACCCAAAGCTGAAGTTCTATTTAAACTATTCCCTGGCGCATATTAATATAGTTCCACAAAATTCAAGAACCTTATCAGTATTAAATTCTTAAAAATCTTTAACAATTTAATACAGTTTTGTACTCAACAGCCATATTAATATTTCATATACCATTAATTACACTAAGTACATAATGATTTATATGCATCAGTACTCCATACGGGTATAGTACATAACATTAATGTATCAAGACATATTATGTATAATAGTACATTACACTATTTACCCCATGCTTATAAGCAAGTACATGACATTATTAATAGTACATAGTACATATTATTATTGATCGTACATAGCACATTATGTCAAATCCATTCTTGTCAACATGCGTATCCCGTCCATTA…
90-95	2760	AGCCCCACTATCAACACCCAAAGCTGAAGTTCTATTTAAACTATTCCCTGGCGCATATTAATATAGTTACACAAAATTCAAGAACCTTATCAGTATTAAATTCTTAAAAATCTTTAACAATTTAATACAGTTTTGTACTCAACAGCCATATTAATATTTCATATACCATTAATTACACTAAGTACATAATGATTTATATGCATCAGTACTCCATACGGGTATAGTACATAACATTAATGTATCAAGACATATTATGTATAATAGTACATTACACTATTTACCCCATGCTTATAAGCAAGTACATGACATTATTAATAGTACATAGTACATATTATTATTGATCGTACATAGCACATTATGTCAAATCCATTCTTGTCAACATGCGTATCCCGTCCATTA…
90-95	2770	AGCCCCACTATCAACACCCAAAGCTGAAGTTCTATTTAAACTATTCCCTGGCGCATATTAATATAGTTCCACAAAATTCAAGAACCTTATCAGTATTAAATTCTTAAAAATCTTTAACAATTTAATACAGTTTTGTACTCAACAGCCATATTAATATTTCATATACCATTAATTACACTAAGTACATAATGATTTATATGCATCAGTACTCCATACGGGTATAGTACATAACATTAATGTATCAAGACATATTATGTATAATAGTACATTACACTATTTACCCCATGCTTATAAGCAAGTACATGACATTATTAATAGTACATAGTACATATTATTATTGATCGTACATAGCACATTATGTCAAATCCATTCTTGTCAACATGCGTATCCCGTCCATTA…
90-95	2930	AGCCCCACTATCAACACCCAAAGCTGAAGTTCTATTTAAACTATTCCCTGGCGCATATTAATATAGTTCCACAAAATTCAAGAACCTTATCAGTATTAAATTCTTAAAAATCTTTAACAATTTAATACAGTTTTGTACTCAACAGCCATATTAATATTTCATATACCATTAATTACACTAAGTACATAATGATTTATATGCATCAGTACTCCATACGGGTATAGTACATAACATTAATGTATCAAGACATATTATGTATAATAGTACATTACACTATTTACCCCATGCTTATAAGCAAGTACATGACATTATTAATAGTACATAGTACATATTATTATTGATCGTACATAGCACATTATGTCAAATCCATTCTTGTCAACATGCGTATCCCGTCCATTA…
90-95	2699A	TGCATGGGCCCGGAGCGAGAAGAGGGATCCTTGCCAAGCGGGTTGTTGGTTTCACGCGGCATGGTAATTAAGCTCGTGATCTAATGGACGGGATACGCATGTTGACAAGAATGGATTTGACATAATGTGCTATGTACGATCAATAATAATATGTACTATGTACTATTAATAATGTCATGTACTTGCTTATAAGCATGGGGTAAATAGTGTAATGTACTATTATACATAATATGTCTTGATACATTAATGTTATGTACTATACCCGTATGGAGTACTGATGCATATAAATCATTATGTACTTAGTGTAATTAATGGTATATGAAATATTAATATGGCTGTTGAGTACAAAACTGTATTAAATTGTTAAAGATTTTTAAGAATTTAATACTGATAAGGTTC…
90-95	989	AGCCCCACTATCAACACCCAAAGCTGAAGTTCTATTTAAACTATTCCCTGGCGCATATTAATATAGTTCCACAAAATTCAAGAACCTTATCAGTATTAAATTCTTAAAAATCTTTAACAATTTAATACAGTTTTGTACTCAACAGCCATATTAATATTTCATATACCATTAATTACACTAAGTACATAATGATTTATATGCATCAGTACTCCATACGGGTATAGTACATAACATTAATGTATCAAGACATATTATGTATAATAGTACATTACACTATTTACCCCATGCTTATAAGCAAGTACATGACATTATTAATAGTACATAGTACATATTATTATTGATCGTACATAGCACATTATGTCAAATCCATTCTTGTCAACATGCGTATCCCGTCCATTA…
90-95	2727	AGCCCCACTATCAACACCCAAAGCTGAAGTTCTATTTAAACTATTCCCTGGCGCATATTAATATAGTTACACAAAATTCAAGAACCTTATCAGTATTAAATTCTTAAAAATCTTTAACAATTTAATACAGTTTTGTACTCAACAGCCATATTAATATTTCATATACCATTAATTACACTAAGTACATAATGATTTATATGCATCAGTACTCCATACGGGTATAGTACATAACATTAATGTATCAAGACATATTATGTATAATAGTACATTACACTATTTACCCCATGCTTATAAGCAAGTACATGACATTATTAATAGTACATAGTACATATTATTATTGATCGTACATAGCACATTATGTCAAATCCATTCTTGTCAACATGCGTATCCCGTCCATTA…
90-95	2729	AGCCCCACTATCAACACCCAAAGCTGAAGTTCTATTTAAACTATTCCCTGGCGCATATTAATATAGTTCCACAAAATTCAAGAACCTTATCAGTATTAAATTCTTAAAAATCTTTAACAATTTAATACAGTTTTGTACTCAACAGCCATATTAATATTTCATATACCATTAATTACACTAAGTACATAATGATTTATATGCATCAGTACTCCATACGGGTATAGTACATAACATTAATGTATCAAGACATATTATGTATAATAGTACATTACACTATTTACCCCATGCTTATAAGCAAGTACATGACATTATTAATAGTACATAGTACATATTATTATTGATCGTACATAGCACATTATGTCAAATCCATTCTTGTCAACATGCGTATCCCGTCCATTA…
90-95	2736	AGCCCCACTATCAACACCCAAAGCTGAAGTTCTATTTAAACTATTCCCTGGCGCATATTAATATAGTTACACAAAATTCAAGAACCTTATCAGTATTAAATTCTTAAAAATCTTTAACAATTTAATACAGTTTTGTACTCAACAGCCATATTAATATTTCATATACCATTAATTACACTAAGTACATAATGATTTATATGCATCAGTACTCCATACGGGTATAGTACATAACATTAATGTATCAAGACATATTATGTATAATAGTACATTACACTATTTACCCCATGCTTATAAGCAAGTACATGACATTATTAATAGTACATAGTACATATTATTATTGATCGTACATAGCACATTATGTCAAATCCATTCTTGTCAACATGCGTATCCCGTCCATTA…
90-95	2739	AGCCCCACTATCAACACCCAAAGCTGAAGTTCTATTTAAACTATTCCCTGGCGCATATTAATATAGTTCCACAAAATTCAAGAACCTTATCAGTATTAAATTCTTAAAAATCTTTAACAATTTAATACAGTTTTGTACTCAACAGCCATATTAATATTTCATATACCATTAATTACACTAAGTACATAATGATTTATATGCATCAGTACTCCATACGGGTATAGTACATAACATTAATGTATCAAGACATATTATGTATAATAGTACATTACACTATTTACCCCATGCTTATAAGCAAGTACATGACATTATTAATAGTACATAGTACATATTATTATTGATCGTACATAGCACATTATGTCAAATCCATTCTTGTCAACATGCGTATCCCGTCCATTA…
90-95	2746	AGCCCCACTATCAACACCCAAAGCTGAAGTTCTATTTAAACTATTCCCTGGCGCATATTAATATAGTTACACAAAATTCAAGAACCTTATCAGTATTAAATTCTTAAAAATCTTTAACAATTTAATACAGTTTTGTACTCAACAGCCATATTAATATTTCATATACCATTAATTACACTAAGTACATAATGATTTATATGCATCAGTACTCCATACGGGTATAGTACATAACATTAATGTATCAAGACATATTATGTATAATAGTACATTACACTATTTACCCCATGCTTATAAGCAAGTACATGACATTATTAATAGTACATAGTACATATTATTATTGATCGTACATAGCACATTATGTCAAATCCATTCTTGTCAACATGCGTATCCCGTCCATTA…
90-95	2749	AGCCCCACTATCAACACCCAAAGCTGAAGTTCTATTTAAACTATTCCCTGGCGCATATTAATATAGTTACACAAAATTCAAGAACCTTATCAGTATTAAATTCTTAAAAATCTTTAACAATTTAATACAGTTTTGTACTCAACAGCCATATTAATATTTCATATACCATTAATTACACTAAGTACATAATGATTTATATGCATCAGTACTCCATACGGGTATAGTACATAACATTAATGTATCAAGACATATTATGTATAATAGTACATTACACTATTTACCCCATGCTTATAAGCAAGTACATGACATTATTAATAGTACATAGTACATATTATTATTGATCGTACATAGCACATTATGTCAAATCCATTCTTGTCAACATGCGTATCCCGTCCATTA…
90-95	2751	AGCCCCACTATCAACACCCAAAGCTGAAGTTCTATTTAAACTATTCCCTGGCGCATATTAATATAGTTCCACAAAATTCAAGAACCTTATCAGTATTAAATTCTTAAAAATCTTTAACAATTTAATACAGTTTTGTACTCAACAGCCATATTAATATTTCATATACCATTAATTACACTAAGTACATAATGATTTATATGCATCAGTACTCCATACGGGTATAGTACATAACATTAATGTATCAAGACATATTATGTATAATAGTACATTACACTATTTACCCCATGCTTATAAGCAAGTACATGACATTATTAATAGTACATAGTACATATTATTATTGATCGTACATAGCACATTATGTCAAATCCATTCTTGTCAACATGCGTATCCCGTCCATTA…
90-95	2752	AGCCCCACTATCAACACCCAAAGCTGAAGTTCTATTTAAACTATTCCCTGGCGCATATTAATATAGTTACACAAAATTCAAGAACCTTATCAGTATTAAATTCTTAAAAATCTTTAACAATTTAATACAGTTTTGTACTCAACAGCCATATTAATATTTCATATACCATTAATTACACTAAGTACATAATGATTTATATGCATCAGTACTCCATACGGGTATAGTACATAACATTAATGTATCAAGACATATTATGTATAATAGTACATTACACTATTTACCCCATGCTTATAAGCAAGTACATGACATTATTAATAGTACATAGTACATATTATTATTGATCGTACATAGCACATTATGTCAAATCCATTCTTGTCAACATGCGTATCCCGTCCATTA…
90-95	2810	AGCCCCACTATCAACACCCAAAGCTGAAGTTCTATTTAAACTATTCCCTGGCGCATATTAATATAGTTACACAAAATTCAAGAACCTTATCAGTATTAAATTCTTAAAAATCTTTAACAATTTAATACAGTTTTGTACTCAACAGCCATATTAATATTTCATATACCATTAATTACACTAAGTACATAATGATTTATATGCATCAGTACTCCATACGGGTATAGTACATAACATTAATGTATCAAGACATATTATGTATAATAGTACATTACACTATTTACCCCATGCTTATAAGCAAGTACATGACATTATTAATAGTACATAGTACATATTATTATTGATCGTACATAGCACATTATGTCAAATCCATTCTTGTCAACATGCGTATCCCGTCCATTA…
90-95	2859	AGCCCCACTATCAACACCCAAAGCTGAAGTTCTATTTAAACTATTCCCTGGCGCATATTAATATAGTTCCACAAAATTCAAGAACCTTATCAGTATTAAATTCTTAAAAATCTTTAACAATTTAATACAGTTTTGTACTCAACAGCCATATTAATATTTCATATACCATTAATTACACTAAGTACATAATGATTTATATGCATCAGTACTCCATACGGGTATAGTACATAACATTAATGTATCAAGACATATTATGTATAATAGTACATTACACTATTTACCCCATGCTTATAAGCAAGTACATGACATTATTAATAGTACATAGTACATATTATTATTGATCGTACATAGCACATTATGTCAAATCCATTCTTGTCAACATGCGTATCCCGTCCATTA…
90-95	2865	AGCCCCACTATCAACACCCAAAGCTGAAGTTCTATTTAAACTATTCCCTGGCGCATATTAATATAGTTCCACAAAATTCAAGAACCTTATCAGTATTAAATTCTTAAAAATCTTTAACAATTTAATACAGTTTTGTACTCAACAGCCATATTAATATTTCATATACCATTAATTACACTAAGTACATAATGATTTATATGCATCAGTACTCCATACGGGTATAGTACATAACATTAATGTATCAAGACATATTATGTATAATAGTACATTACACTATTTACCCCATGCTTATAAGCAAGTACATGACATTATTAATAGTACATAGTACATATTATTATTGATCGTACATAGCACATTATGTCAAATCCATTCTTGTCAACATGCGTATCCCGTCCATTA…
90-95	2868	CCACAAAATTCAAGAACCTTATCAGTATTAAATTCTTAAAAATCTTTAACAATTTAATACAGTTTTGTACTCAACAGCCATATTAATATTTCATATACCATTAATTACACTAAGTACATAATGATTTATATGCATCAGTACTCCATACGGGTATAGTACATAACATTAATGTATCAAGACATATTATGTATAATAGTACATTACACTATTTACCCCATGCTTATAAGCAAGTACATGACATTATTAATAGTACATAGTACATATTATTATTGATCGTACATAGCACATTATGTCAAATCCATTCTTGTCAACATGCGTATCCCGTCCATTAGATCACGAGCTTAATTACCATGCCGCGTGAAACCAACAACCCGCTTGGCAAGGATCCCTCTTCTCGCT…
90-95	2889	AGCCCCACTATCAACACCCAAAGCTGAAGTTCTATTTAAACTATTCCCTGGCGCATATTAATATAGTTACACAAAATTCAAGAACCTTATCAGTATTAAATTCTTAAAAATCTTTAACAATTTAATACAGTTTTGTACTCAACAGCCATATTAATATTTCATATACCATTAATTACACTAAGTACATAATGATTTATATGCATCAGTACTCCATACGGGTATAGTACATAACATTAATGTATCAAGACATATTATGTATAATAGTACATTACACTATTTACCCCATGCTTATAAGCAAGTACATGACATTATTAATAGTACATAGTACATATTATTATTGATCGTACATAGCACATTATGTCAAATCCATTCTTGTCAACATGCGTATCCCGTCCATTA…
90-95	2975	AGCCCCACTATCAACACCCAAAGCTGAAGTTCTATTTAAACTATTCCCTGGCGCATATTAATATAGTTCCACAAAATTCAAGAACCTTATCAGTATTAAATTCTTAAAAATCTTTAACAATTTAATACAGTTTTGTACTCAACAGCCATATTAATATTTCATATACCATTAATTACACTAAGTACATAATGATTTATATGCATCAGTACTCCATACGGGTATAGTACATAACATTAATGTATCAAGACATATTATGTATAATAGTACATTACACTATTTACCCCATGCTTATAAGCAAGTACATGACATTATTAATAGTACATAGTACATATTATTATTGATCGTACATAGCACATTATGTCAAATCCATTCTTGTCAACATGCGTATCCCGTCCATTA…
90-95	2976	AGCCCCACTATCAACACCCAAAGCTGAAGTTCTATTTAAACTATTCCCTGGCGCATATTAATATAGTTACACAAAATTCAAGAACCTTATCAGTATTAAATTCTTAAAAATCTTTAACAATTTAATACAGTTTTGTACTCAACAGCCATATTAATATTTCATATACCATTAATTACACTAAGTACATAATGATTTATATGCATCAGTACTCCATACGGGTATAGTACATAACATTAATGTATCAAGACATATTATGTATAATAGTACATTACACTATTTACCCCATGCTTATAAGCAAGTACATGACATTATTAATAGTACATAGTACATATTATTATTGATCGTACATAGCACATTATGTCAAATCCATTCTTGTCAACATGCGTATCCCGTCCATTA…
90-95	2991	AGCCCCACTATCAACACCCAAAGCTGAAGTTCTATTTAAACTATTCCCTGGCGCATATTAATATAGTTACACAAAATTCAAGAACCTTATCAGTATTAAATTCTTAAAAATCTTTAACAATTTAATACAGTTTTGTACTCAACAGCCATATTAATATTTCATATACCATTAATTACACTAAGTACATAATGATTTATATGCATCAGTACTCCATACGGGTATAGTACATAACATTAATGTATCAAGACATATTATGTATAATAGTACATTACACTATTTACCCCATGCTTATAAGCAAGTACATGACATTATTAATAGTACATAGTACATATTATTATTGATCGTACATAGCACATTATGTCAAATCCATTCTTGTCAACATGCGTATCCCGTCCATTA…
90-95	2993	AGCCCCACTATCAACACCCAAAGCTGAAGTTCTATTTAAACTATTCCCTGGCGCATATTAATATAGTTCCACAAAATTCAAGAACCTTATCAGTATTAAATTCTTAAAAATCTTTAACAATTTAATACAGTTTTGTACTCAACAGCCATATTAATATTTCATATACCATTAATTACACTAAGTACATAATGATTTATATGCATCAGTACTCCATACGGGTATAGTACATAACATTAATGTATCAAGACATATTATGTATAATAGTACATTACACTATTTACCCCATGCTTATAAGCAAGTACATGACATTATTAATAGTACATAGTACATATTATTATTGATCGTACATAGCACATTATGTCAAATCCATTCTTGTCAACATGCGTATCCCGTCCATTA…
90-95	2995	AGCCCCACTATCAACACCCAAAGCTGAAGTTCTATTTAAACTATTCCCTGGCGCATATTAATATAGTTCCACAAAATTCAAGAACCTTATCAGTATTAAATTCTTAAAAATCTTTAACAATTTAATACAGTTTTGTACTCAACAGCCATATTAATATTTCATATACCATTAATTACACTAAGTACATAATGATTTATATGCATCAGTACTCCATACGGGTATAGTACATAACATTAATGTATCAAGACATATTATGTATAATAGTACATTACACTATTTACCCCATGCTTATAAGCAAGTACATGACATTATTAATAGTACATAGTACATATTATTATTGATCGTACATAGCACATTATGTCAAATCCATTCTTGTCAACATGCGTATCCCGTCCATTA…
UNK	2863	CCACAAAATTCAAGAACCTTATCAGTATTAAATTCTTAAAAATCTTTAACAATTTAATACAGTTTTGTACTCAACAGCCATATTAATATTTCATATACCATTAATTACACTAAGTACATAATGATTTATATGCATCAGTACTCCATACGGGTATAGTACATAACATTAATGTATCAAGACATATTATGTATAATAGTACATTACACTATTTACCCCATGCTTATAAGCAAGTACATGACATTATTAATAGTACATAGTACATATTATTATTGATCGTACATAGCACATTATGTCAAATCCATTCTTGTCAACATGCGTATCCCGTCCATTAGATCACGAGCTTAATTACCATGCCGCGTGAAACCAACAACCCGCTTGGCAAGGATCCCTCTTCTCGCT…
YOB 1967	1701	AGTGCATGGGCCCGGAGCGAGAAGAGGGATCCTTGCCAAGCGGGTTGTTGGTTTCACGCGGCATGGTAATTAAGCTCGTGATCTAATGGACGGGATACGCATGTTGACAAGAATGGATTTGACATAATGTGCTATGTACGATCAATAATAATATGTACTATGTACTATTAATAATGTCATGTACTTGCTTATAAGCATGGGGTAAATAGTGTAATGTACTATTATACATAATATGTCTTGATACATTAATGTTATGTACTATACCCGTATGGAGTACTGATGCATATAAATCATTATGTACTTAGTGTAATTAATGGTATATGAAATATTAATATGGCTGTTGAGTACAAAACTGTATTAAATTGTTAAAGATTTTTAAGAATTTAATACTGATAAGGT…
YOB 1967	1702	AGTGCATGGGCCCGGAGCGAGAAGAGGGATCCTTGCCAAGCGGGTTGTTGGTTTCACGCGGCATGGTAATTAAGCTCGTGATCTAATGGACGGGATACGCATGTTGACAAGAATGGATTTGACATAATGTGCTATGTACGATCAATAATAATATGTACTATGTACTATTAATAATGTCATGTACTTGCTTATAAGCATGGGGTAAATAGTGTAATGTACTATTATACATAATATGTCTTGATACATTAATGTTATGTACTATACCCGTATGGAGTACTGATGCATATAAATCATTATGTACTTAGTGTAATTAATGGTATATGAAATATTAATATGGCTGTTGAGTACAAAACTGTATTAAATTGTTAAAGATTTTTAAGAATTTAATACTGATAAGGT…
YOB 1967	1791	GCATGGGCCCGGAGCGAGAAGAGGGATCCTTGCCAAGCGGGTTGTTGGTTTCACGCGGCATGGTAATTAAGCTCGTGATCTAATGGACGGGATACGCATGTTGACAAGAATGGATTTGACATAATGTGCTATGTACGATCAATAATAATATGTACTATGTACTATTAATAATGTCATGTACTTGCTTATAAGCATGGGGTAAATAGTGTAATGTACTATTATACATAATATGTCTTGATACATTAATGTTATGTACTATACCCGTATGGAGTACTGATGCATATAAATCATTATGTACTTAGTGTAATTAATGGTATATGAAATATTAATATGGCTGTTGAGTACAAAACTGTATTAAATTGTTAAAGATTTTTAAGAATTTAATACTGATAAGGTTCT…
YOB 1968	1823	CATGGGCCCGGAGCGAGAAGAGGGATCCTTGCCAAGCGGGTTGTTGGTTTCACGCGGCATGGTAATTAAGCTCGTGATCTAATGGACGGGATACGCATGTTGACAAGAATGGATTTGACATAATGTGCTATGTACGATCAATAATAATATGTACTATGTACTATTAATAATGTCATGTACTTGCTTATAAGCATGGGGTAAATAGTGTAATGTACTATTATACATAATATGTCTTGATACATTAATGTTATGTACTATACCCGTATGGAGTACTGATGCATATAAATCATTATGTACTTAGTGTAATTAATGGTATATGAAATATTAATATGGCTGTTGAGTACAAAACTGTATTAAATTGTTAAAGATTTTTAAGAATTTAATACTGATAAGGTTCTT…
YOB 1968	1843	AGCCCCACTATCAACACCCAAAGCTGAAGTTCTATTTAAACTATTCCCTGGCGCATATTAATATAGTTCCACAAAATTCAAGAACCTTATCAGTATTAAATTCTTAAAAATCTTTAACAATTTAATACAGTTTTGTACTCAACAGCCATATTAATATTTCATATACCATTAATTACACTAAGTACATAATGATTTATATGCATCAGTACTCCATACGGGTATAGTACATAACATTAATGTATCAAGACATATTATGTATAATAGTACATTACACTATTTACCCCATGCTTATAAGCAAGTACATGACATTATTAATAGTACATAGTACATATTATTATTGATCGTACATAGCACATTATGTCAAATCCATTCTTGTCAACATGCGTATCCCGTCCATTA…
YOB 1987	1923	AGCCCCACTATCAACACCCAAAGCTGAAGTTCTATTTAAACTATTCCCTGGCGCATATTAATATAGTTCCACAAAATTCAAGAACCTTATCAGTATTAAATTCTTAAAAATCTTTAACAATTTAATACAGTTTTGTACTCAACAGCCATATTAATATTTCATATACCATTAATTACACTAAGTACATAATGATTTATATGCATCAGTACTCCATACGGGTATAGTACATAACATTAATGTATCAAGACATATTATGTATAATAGTACATTACACTATTTACCCCATGCTTATAAGCAAGTACATGACATTATTAATAGTACATAGTACATATTATTATTGATCGTACATAGCACATTATGTCAAATCCATTCTTGTCAACATGCGTATCCCGTCCATTA…
YOB 1987	1923A	AGCCCCACTATCAACACCCAAAGCTGAAGTTCTATTTAAACTATTCCCTGGCGCATATTAATATAGTTCCACAAAATTCAAGAACCTTATCAGTATTAAATTCTTAAAAATCTTTAACAATTTAATACAGTTTTGTACTCAACAGCCATATTAATATTTCATATACCATTAATTACACTAAGTACATAATGATTTATATGCATCAGTACTCCATACGGGTATAGTACATAACATTAATGTATCAAGACATATTATGTATAATAGTACATTACACTATTTACCCCATGCTTATAAGCAAGTACATGACATTATTAATAGTACATAGTACATATTATTATTGATCGTACATAGCACATTATGTCAAATCCATTCTTGTCAACATGCGTATCCCGTCCATTA…
YOB 1996	3274	AGCCCCACTATCAACACCCAAAGCTGAAGTTCTATTTAAACTATTCCCTGGCGCATATTAATATAGTTCCACAAAATTCAAGAACCTTATCAGTATTAAATTCTTAAAAATCTTTAACAATTTAATACAGTTTTGTACTCAACAGCCATATTAATATTTCATATACCATTAATTACACTAAGTACATAATGATTTATATGCATCAGTACTCCATACGGGTATAGTACATAACATTAATGTATCAAGACATATTATGTATAATAGTACATTACACTATTTACCCCATGCTTATAAGCAAGTACATGACATTATTAATAGTACATAGTACATATTATTATTGATCGTACATAGCACATTATGTCAAATCCATTCTTGTCAACATGCGTATCCCGTCCATTA…
YOB 1997	3319	CATGGGCCCGGAGCGAGAAGAGGGATCCTTGCCAAGCGGGTTGTTGGTTTCACGCGGCATGGTAATTAAGCTCGTGATCTAATGGACGGGATACGCATGTTGACAAGAATGGATTTGACATAATGTGCTATGTACGATCAATAATAATATGTACTATGTACTATTAATAATGTCATGTACTTGCTTATAAGCATGGGGTAAATAGTGTAATGTACTATTATACATAATATGTCTTGATACATTAATGTTATGTACTATACCCGTATGGAGTACTGATGCATATAAATCATTATGTACTTAGTGTAATTAATGGTATATGAAATATTAATATGGCTGTTGAGTACAAAACTGTATTAAATTGTTAAAGATTTTTAATACTTTAATACTGATACGGTTCTT…
YOB 1999	4231	GCATGGGCCCGGAGCGAGAAGAGGGATCCTTGCCAAGCGGGTTGTTGGTTTCACGCGGCATGGTAATTAAGCTCGTGATCTAATGGACGGGATACGCATGTTGACAAGAATGGATTTGACATAATGTGCTATGTACGATCAATAATAATATGTACTATGTACTATTAATAATGTCATGTACTTGCTTATAAGCATGGGGTAAATAGTGTAATGTACTATTATACATAATATGTCTTGATACATTAATGTTATGTACTATACCCGTATGGAGTACTGATGCATATAAATCATTATGTACTTAGTGTAATTAATGGTATATGAAATATTAATATGGCTGTTGAGTACAAAACTGTATTAAATTGTTAAAGATTTTTAAGAATTTAATACTGATAAGGTTCT…
